# Supplementary material for: Pharmacological Inhibition of Lipid Import and Transport Proteins in Ovarian Cancer
Source: MDPI journal article supplement (doi:10.3390/cancers14236004), 2022-12-05

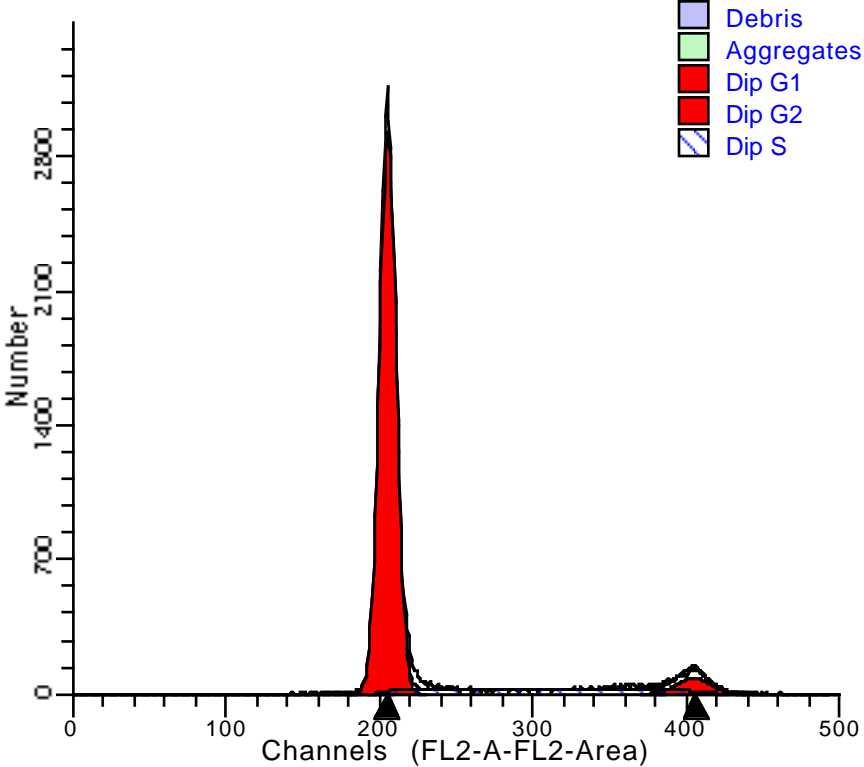

File analyzed: A2780 DMSO-Co.000  
Date analyzed: 5-Feb-2019  
Model: 1DA0n\_DSD  
Analysis type: Manual analysis

Ploidy Mode: First cycle is diploid

Diploid: 100.00 %  
Dip G1: 83.91 % at 205.34  
Dip G2: 4.53 % at 404.51  
Dip S: 11.56 % G2/G1: 1.97  
%CV: 2.67

Total S-Phase: 11.56 %  
Total B.A.D.: 1.24 %

Debris: 0.20 %  
Aggregates: 1.73 %  
Modeled events: 48884  
All cycle events: 47939  
Cycle events per channel: 239  
RCS: 3.429

|       |                        |
|-------|------------------------|
| 2.67  | % CV                   |
| 47939 | Cell Number            |
| 239   | Avg. Cells Per Channel |
| n/a   | Aneuploid Fraction     |
| 1.24  | % B.A.D.               |
| 3.43  | RCS                    |

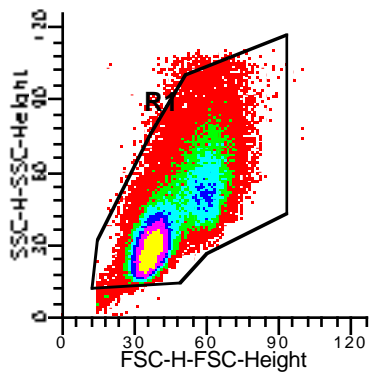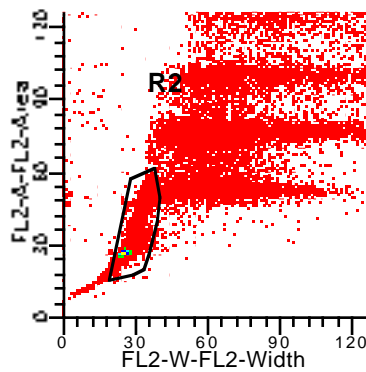

Supplementary Figure S4

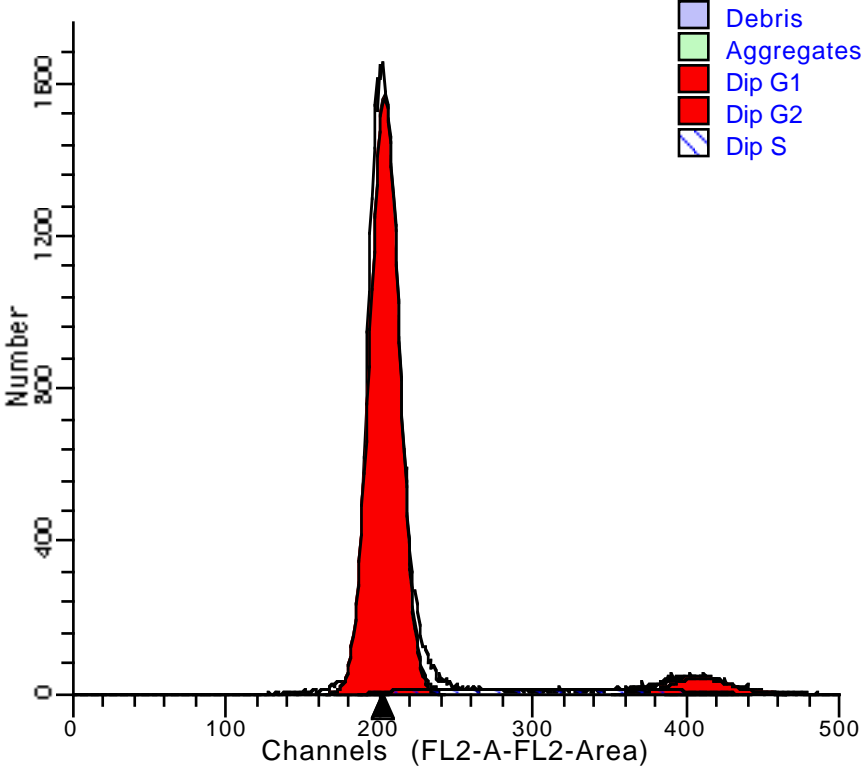

File analyzed: A2780 30uM BMS.0  
 Date analyzed: 5-Feb-2019  
 Model: 1DA0n\_DSD  
 Analysis type: Manual analysis

Ploidy Mode: First cycle is diploid

Diploid: 100.00 %  
 Dip G1: 89.42 % at 203.32  
 Dip G2: 4.67 % at 408.67  
 Dip S: 5.91 % G2/G1: 2.01  
 %CV: 4.63

Total S-Phase: 5.91 %  
 Total B.A.D.: 0.10 %

Debris: 0.18 %  
 Aggregates: 0.13 %  
 Modeled events: 41408  
 All cycle events: 41276  
 Cycle events per channel: 200  
 RCS: 4.822

|       |                        |
|-------|------------------------|
| 4.63  | % CV                   |
| 41276 | Cell Number            |
| 200   | Avg. Cells Per Channel |
| n/a   | Aneuploid Fraction     |
| 0.10  | % B.A.D.               |
| 4.82  | RCS                    |

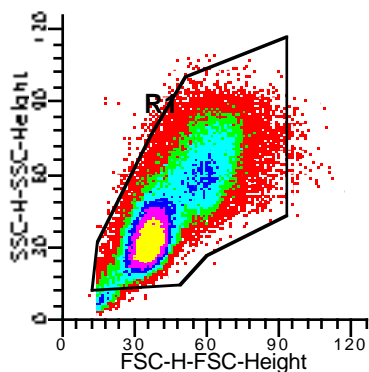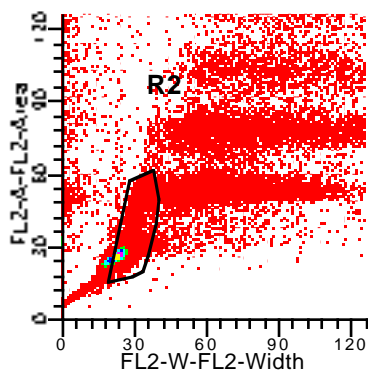

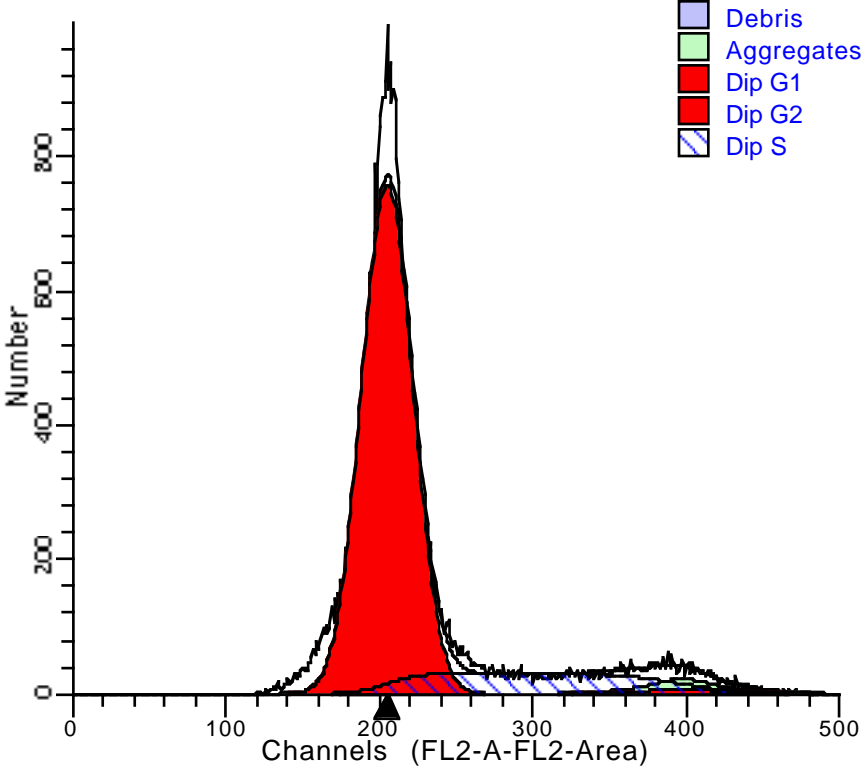

File analyzed: A2780 40uM BMS.0  
Date analyzed: 5-Feb-2019  
Model: 1DA0n\_DSD  
Analysis type: Manual analysis

Ploidy Mode: First cycle is diploid

Diploid: 100.00 %  
Dip G1: 83.49 % at 204.99  
Dip G2: 1.16 % at 395.63  
Dip S: 15.35 % G2/G1: 1.93  
%CV: 8.14

Total S-Phase: 15.35 %  
Total B.A.D.: 2.66 %

Debris: 0.20 %  
Aggregates: 3.56 %  
Modeled events: 39413  
All cycle events: 37930  
Cycle events per channel: 198  
RCS: 4.268

|       |                        |
|-------|------------------------|
| 8.14  | % CV                   |
| 37930 | Cell Number            |
| 198   | Avg. Cells Per Channel |
| n/a   | Aneuploid Fraction     |
| 2.66  | % B.A.D.               |
| 4.27  | RCS                    |

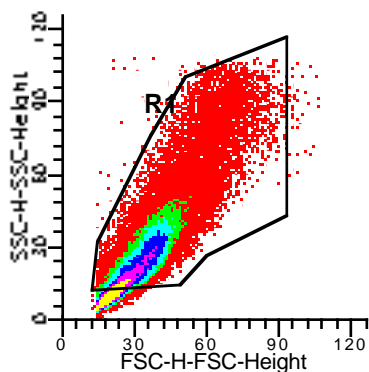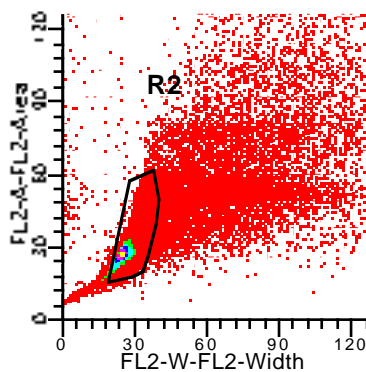

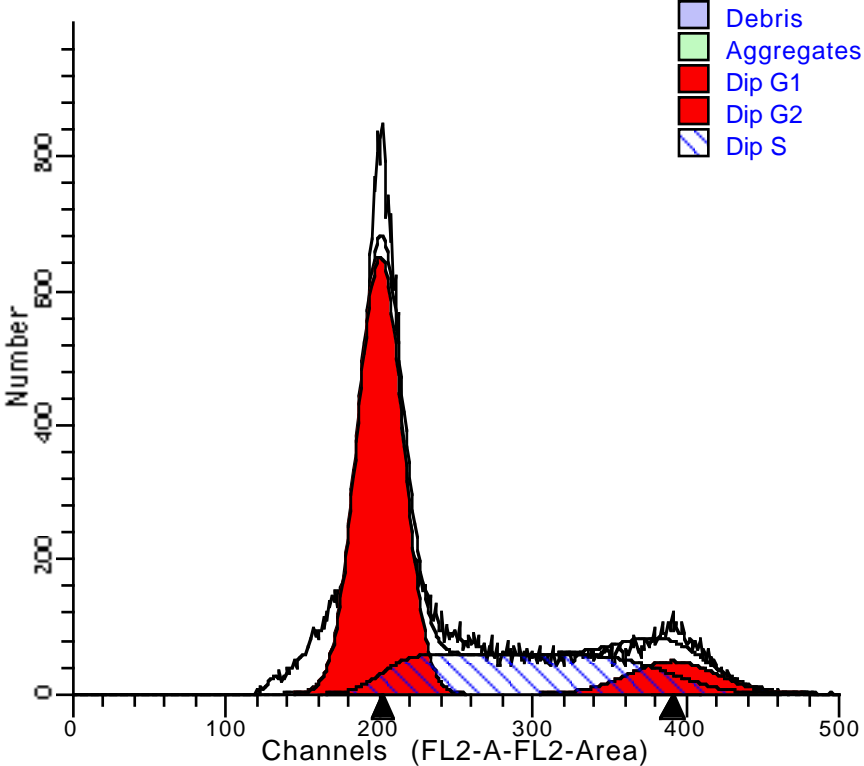

File analyzed: A2780 50uM BMS.0

Date analyzed: 5-Feb-2019

Model: 1DA0n\_DSD

Analysis type: Manual analysis

Ploidy Mode: First cycle is diploid

Diploid: 100.00 %

Dip G1: 61.95 % at 200.34

Dip G2: 9.00 % at 390.67

Dip S: 29.05 % G2/G1: 1.95

%CV: 7.31

Total S-Phase: 29.05 %

Total B.A.D.: 0.06 %

Debris: 0.24 %

Aggregates: 0.13 %

Modeled events: 38768

All cycle events: 38627

Cycle events per channel: 202

RCS: 7.004

|       |                        |
|-------|------------------------|
| 7.31  | % CV                   |
| 38627 | Cell Number            |
| 202   | Avg. Cells Per Channel |
| n/a   | Aneuploid Fraction     |
| 0.06  | % B.A.D.               |
| 7.00  | RCS                    |

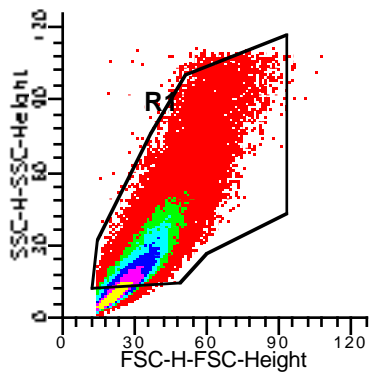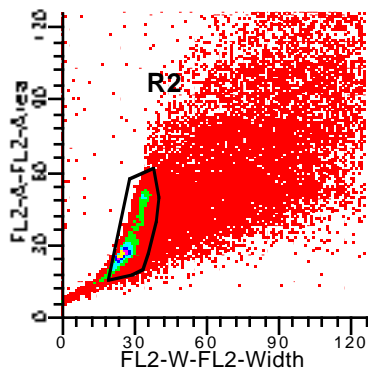

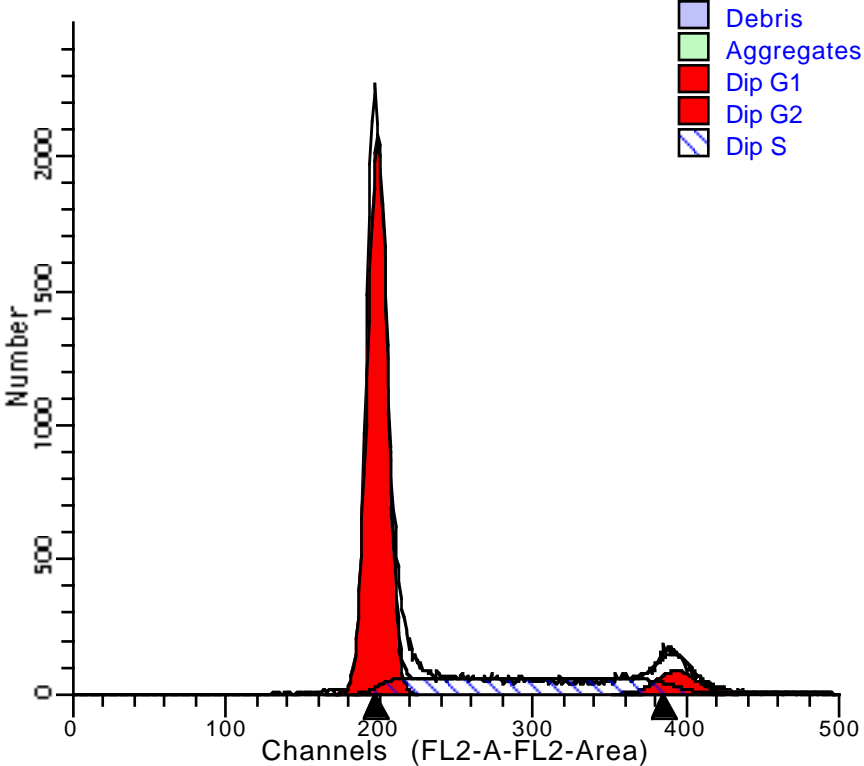

File analyzed: A2780 30uM HTS.0  
Date analyzed: 5-Feb-2019  
Model: 1DA0n\_DSD  
Analysis type: Manual analysis

Ploidy Mode: First cycle is diploid

Diploid: 100.00 %  
Dip G1: 70.86 % at 198.64  
Dip G2: 5.84 % at 393.30  
Dip S: 23.30 % G2/G1: 1.98  
%CV: 3.20

Total S-Phase: 23.30 %  
Total B.A.D.: 1.39 %

Debris: 0.18 %  
Aggregates: 2.41 %  
Modeled events: 47491  
All cycle events: 46258  
Cycle events per channel: 236  
RCS: 6.707

|       |                        |
|-------|------------------------|
| 3.20  | % CV                   |
| 46258 | Cell Number            |
| 236   | Avg. Cells Per Channel |
| n/a   | Aneuploid Fraction     |
| 1.39  | % B.A.D.               |
| 6.71  | RCS                    |

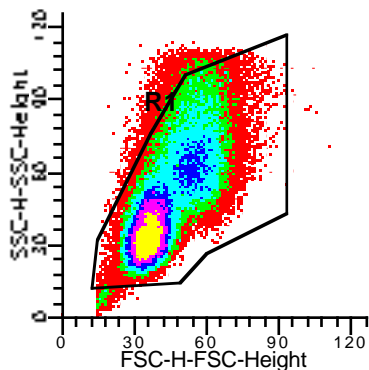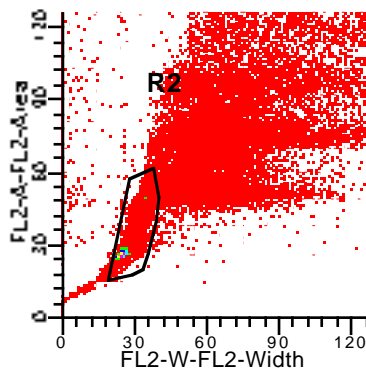

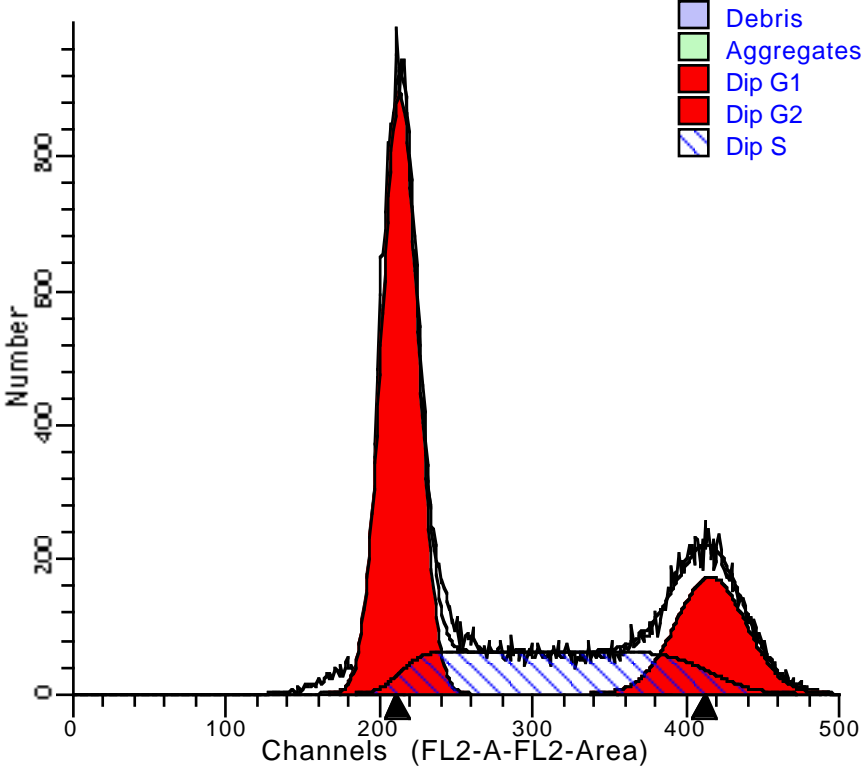

File analyzed: A2780 40uM HTS.0  
Date analyzed: 5-Feb-2019  
Model: 1DA0n\_DSD  
Analysis type: Manual analysis

Ploidy Mode: First cycle is diploid

Diploid: 100.00 %  
Dip G1: 53.52 % at 213.18  
Dip G2: 20.35 % at 415.71  
Dip S: 26.13 % G2/G1: 1.95  
%CV: 5.50

Total S-Phase: 26.13 %  
Total B.A.D.: 1.07 %

Debris: 0.21 %  
Aggregates: 1.64 %  
Modeled events: 50027  
All cycle events: 49098  
Cycle events per channel: 241  
RCS: 3.299

|       |                        |
|-------|------------------------|
| 5.50  | % CV                   |
| 49098 | Cell Number            |
| 241   | Avg. Cells Per Channel |
| n/a   | Aneuploid Fraction     |
| 1.07  | % B.A.D.               |
| 3.30  | RCS                    |

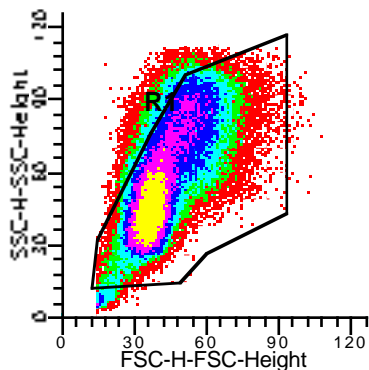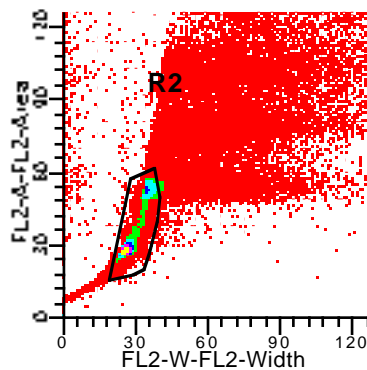

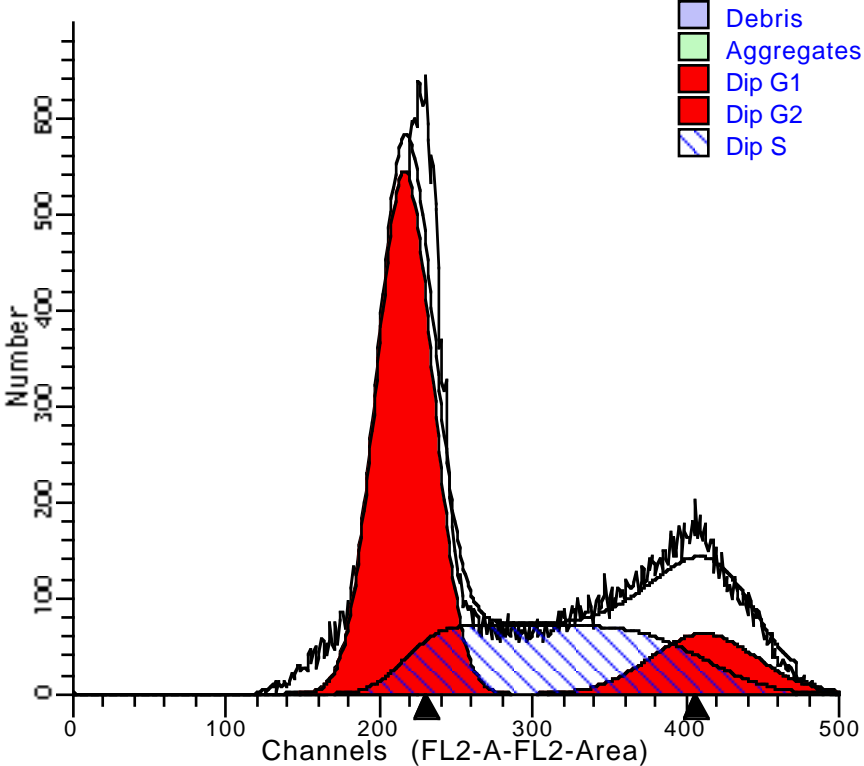

File analyzed: A2780 50uM HTS.0  
Date analyzed: 5-Feb-2019  
Model: 1DA0n\_DSD  
Analysis type: Manual analysis

Ploidy Mode: First cycle is diploid

Diploid: 100.00 %  
Dip G1: 56.12 % at 216.36  
Dip G2: 12.17 % at 411.09  
Dip S: 31.71 % G2/G1: 1.90  
%CV: 8.43

Total S-Phase: 31.71 %  
Total B.A.D.: 4.49 %

Debris: 0.24 %  
Aggregates: 7.29 %  
Modeled events: 48030  
All cycle events: 44412  
Cycle events per channel: 227  
RCS: 5.456

|       |                        |
|-------|------------------------|
| 8.43  | % CV                   |
| 44412 | Cell Number            |
| 227   | Avg. Cells Per Channel |
| n/a   | Aneuploid Fraction     |
| 4.49  | % B.A.D.               |
| 5.46  | RCS                    |

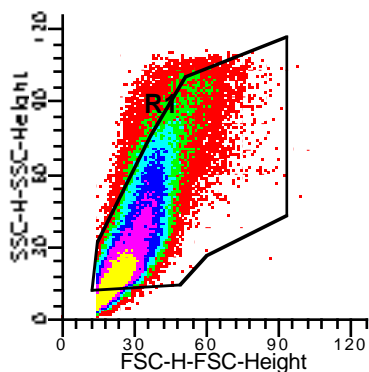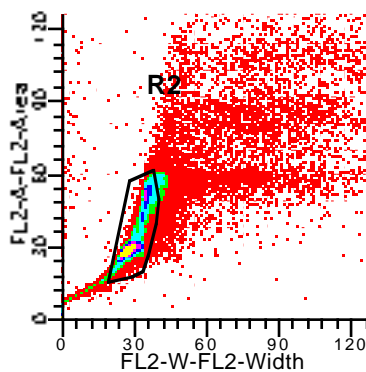

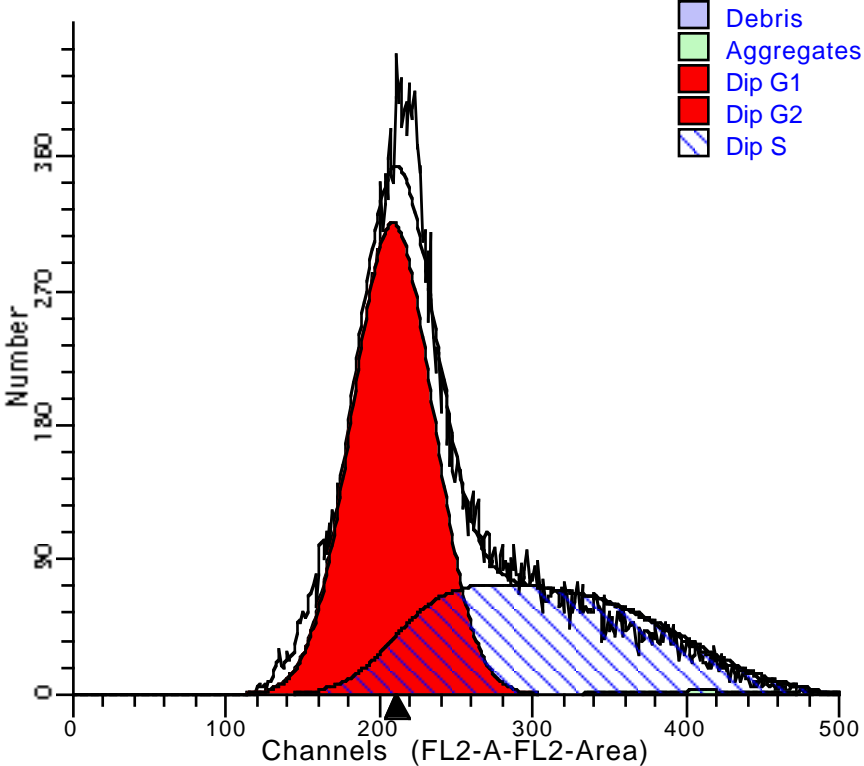

File analyzed: A2780 10uM NAV.02  
 Date analyzed: 5-Feb-2019  
 Model: 1DA0n\_DSD  
 Analysis type: Manual analysis

Ploidy Mode: First cycle is diploid

Diploid: 100.00 %  
 Dip G1: 59.93 % at 208.55  
 Dip G2: 0.00 % at 396.25  
 Dip S: 40.07 % G2/G1: 1.90  
 %CV: 12.53

Total S-Phase: 40.07 %  
 Total B.A.D.: 0.40 %

Debris: 0.06 %  
 Aggregates: 0.74 %  
 Modeled events: 34733  
 All cycle events: 34455  
 Cycle events per channel: 183  
 RCS: 3.573

|       |                        |
|-------|------------------------|
| 12.53 | % CV                   |
| 34455 | Cell Number            |
| 183   | Avg. Cells Per Channel |
| n/a   | Aneuploid Fraction     |
| 0.40  | % B.A.D.               |
| 3.57  | RCS                    |

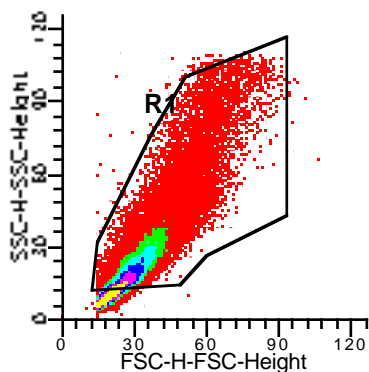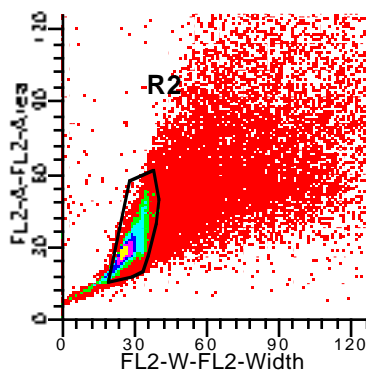



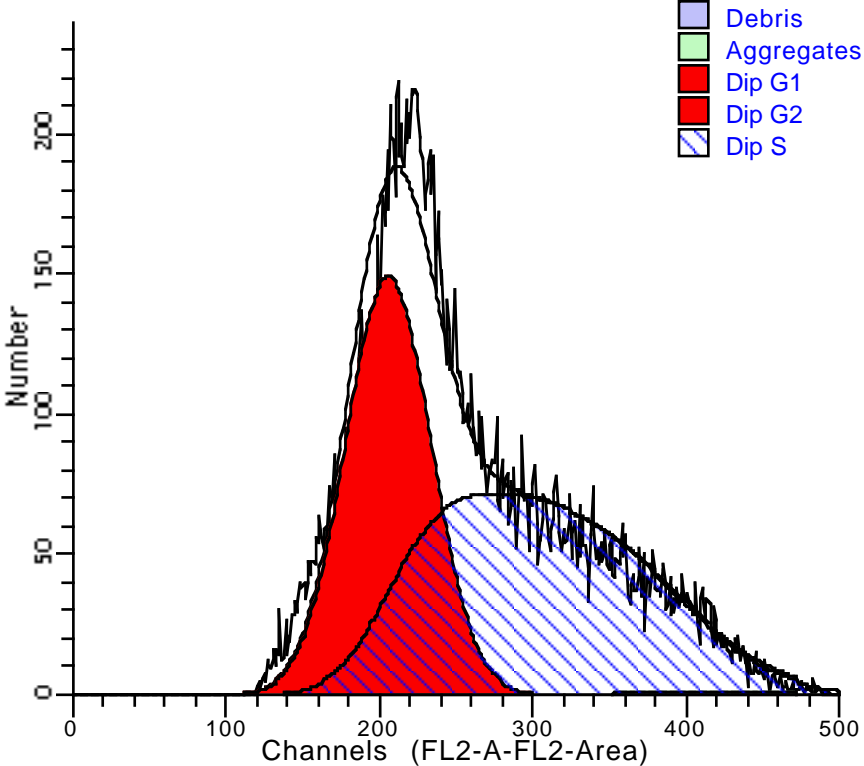

File analyzed: A2780 20uM NAV.02  
Date analyzed: 5-Feb-2019  
Model: 1DA0n\_DSD  
Analysis type: Manual analysis

Ploidy Mode: First cycle is diploid

Diploid: 100.00 %  
Dip G1: 43.49 % at 205.71  
Dip G2: 0.00 % at 390.85  
Dip S: 56.51 % G2/G1: 1.90  
%CV: 13.50

Total S-Phase: 56.51 %  
Total B.A.D.: 0.23 %

Debris: 0.02 %  
Aggregates: 0.57 %  
Modeled events: 23994  
All cycle events: 23854  
Cycle events per channel: 128  
RCS: 2.534

|       |                        |
|-------|------------------------|
| 13.50 | % CV                   |
| 23854 | Cell Number            |
| 128   | Avg. Cells Per Channel |
| n/a   | Aneuploid Fraction     |
| 0.23  | % B.A.D.               |
| 2.53  | RCS                    |

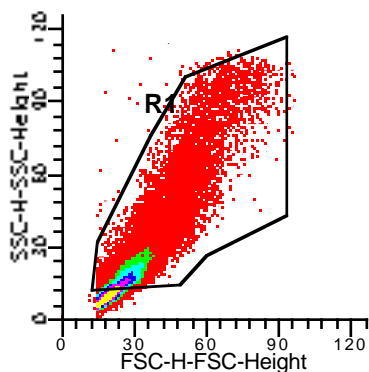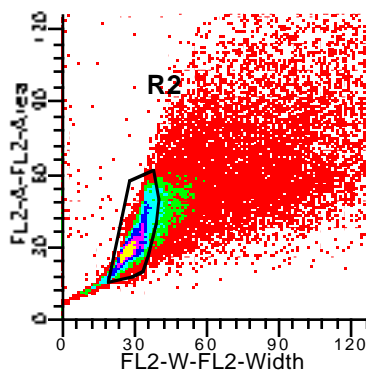

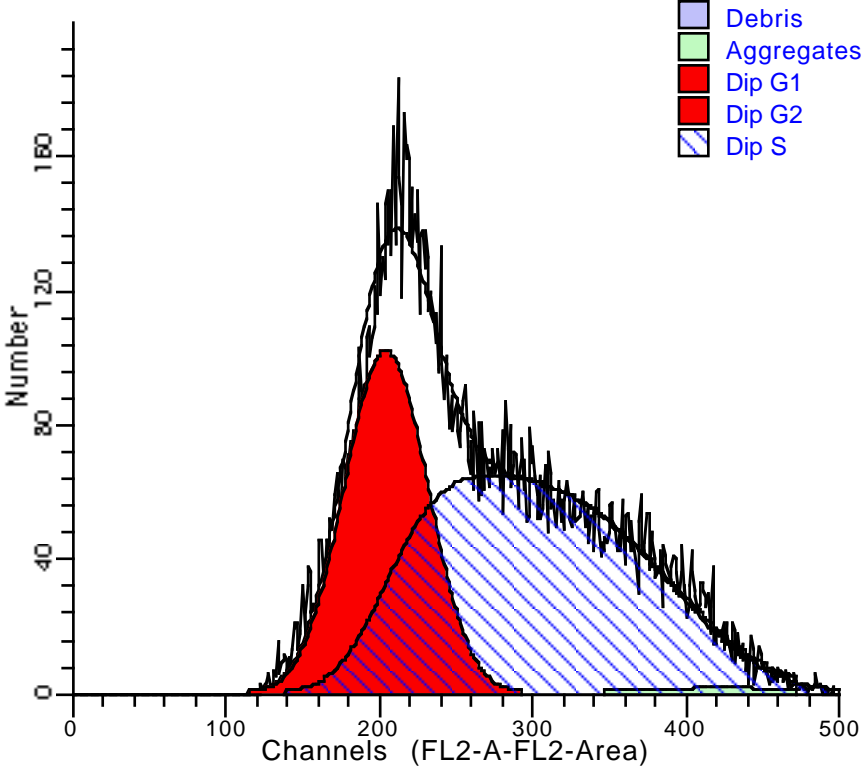

File analyzed: A2780 30uM NAV.02  
Date analyzed: 5-Feb-2019  
Model: 1DA0n\_DSD  
Analysis type: Manual analysis

Ploidy Mode: First cycle is diploid

Diploid: 100.00 %  
Dip G1: 36.52 % at 204.27  
Dip G2: 0.00 % at 388.11  
Dip S: 63.48 % G2/G1: 1.90  
%CV: 13.30

Total S-Phase: 63.48 %  
Total B.A.D.: 0.30 %

Debris: 0.01 %  
Aggregates: 0.89 %  
Modeled events: 19279  
All cycle events: 19105  
Cycle events per channel: 103  
RCS: 1.290

|       |                        |
|-------|------------------------|
| 13.30 | % CV                   |
| 19105 | Cell Number            |
| 103   | Avg. Cells Per Channel |
| n/a   | Aneuploid Fraction     |
| 0.30  | % B.A.D.               |
| 1.29  | RCS                    |

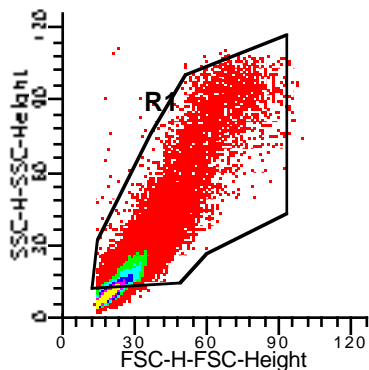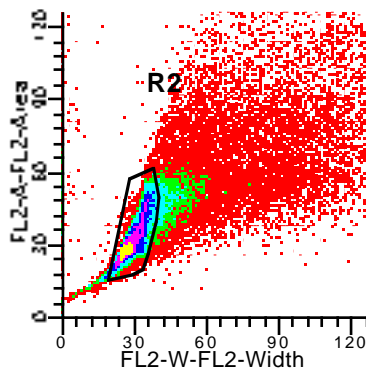

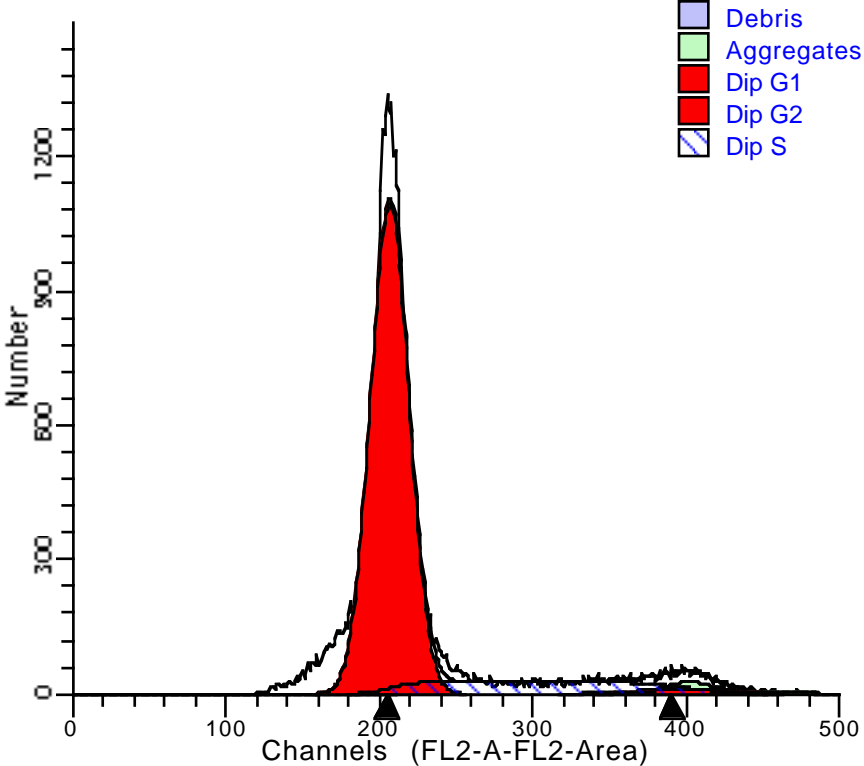

File analyzed: A2780 30uM SB-FI  
Date analyzed: 5-Feb-2019  
Model: 1DA0n\_DSD  
Analysis type: Manual analysis

Ploidy Mode: First cycle is diploid

Diploid: 100.00 %  
Dip G1: 85.18 % at 206.60  
Dip G2: 1.69 % at 400.81  
Dip S: 13.13 % G2/G1: 1.94  
%CV: 6.05

Total S-Phase: 13.13 %  
Total B.A.D.: 2.81 %

Debris: 0.24 %  
Aggregates: 3.40 %  
Modeled events: 41773  
All cycle events: 40254  
Cycle events per channel: 206  
RCS: 8.136

|       |                        |
|-------|------------------------|
| 6.05  | % CV                   |
| 40254 | Cell Number            |
| 206   | Avg. Cells Per Channel |
| n/a   | Aneuploid Fraction     |
| 2.81  | % B.A.D.               |
| 8.14  | RCS                    |

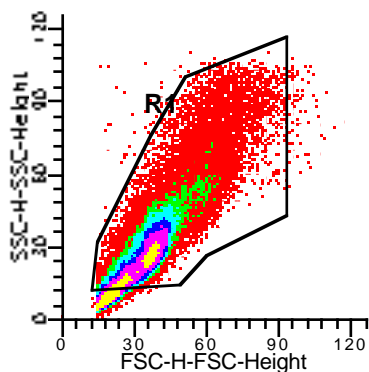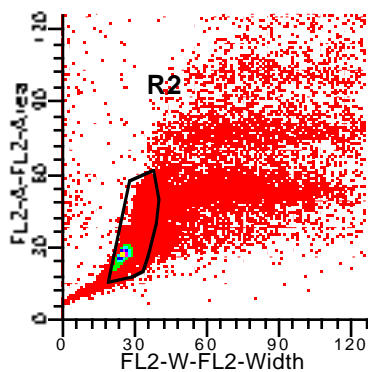

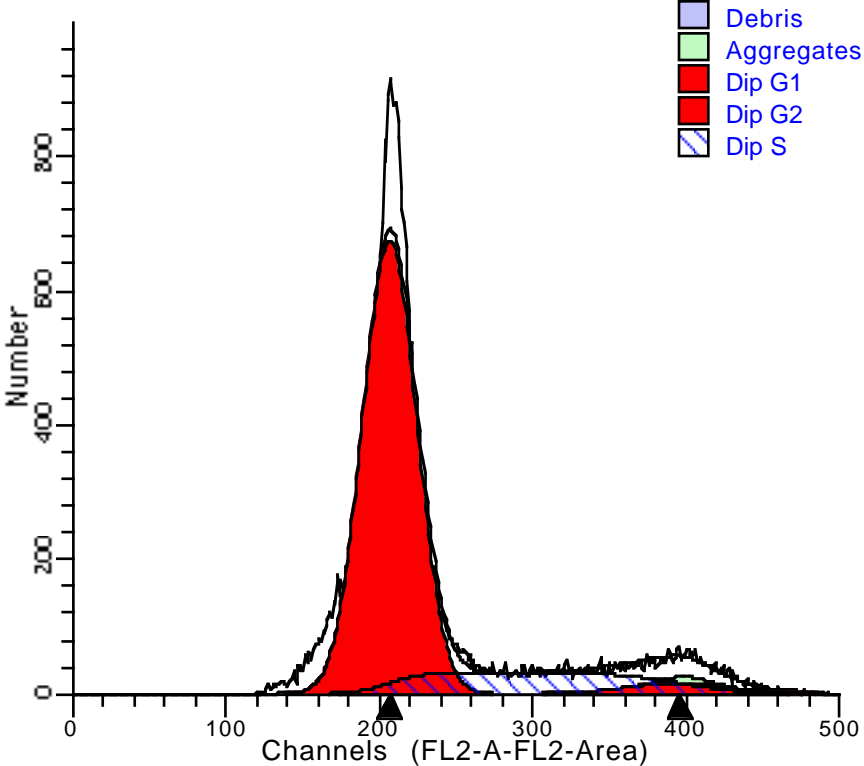

File analyzed: A2780 40uM SB-FI  
Date analyzed: 5-Feb-2019  
Model: 1DA0n\_DSD  
Analysis type: Manual analysis

Ploidy Mode: First cycle is diploid

Diploid: 100.00 %  
Dip G1: 80.23 % at 206.52  
Dip G2: 3.55 % at 394.45  
Dip S: 16.22 % G2/G1: 1.91  
%CV: 8.50

Total S-Phase: 16.22 %  
Total B.A.D.: 3.21 %

Debris: 0.21 %  
Aggregates: 4.28 %  
Modeled events: 38796  
All cycle events: 37054  
Cycle events per channel: 196  
RCS: 5.316

|       |                        |
|-------|------------------------|
| 8.50  | % CV                   |
| 37054 | Cell Number            |
| 196   | Avg. Cells Per Channel |
| n/a   | Aneuploid Fraction     |
| 3.21  | % B.A.D.               |
| 5.32  | RCS                    |

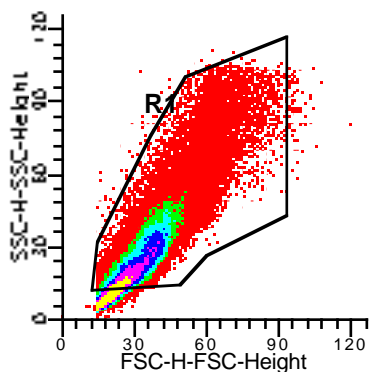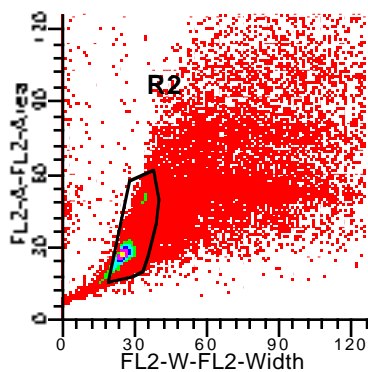

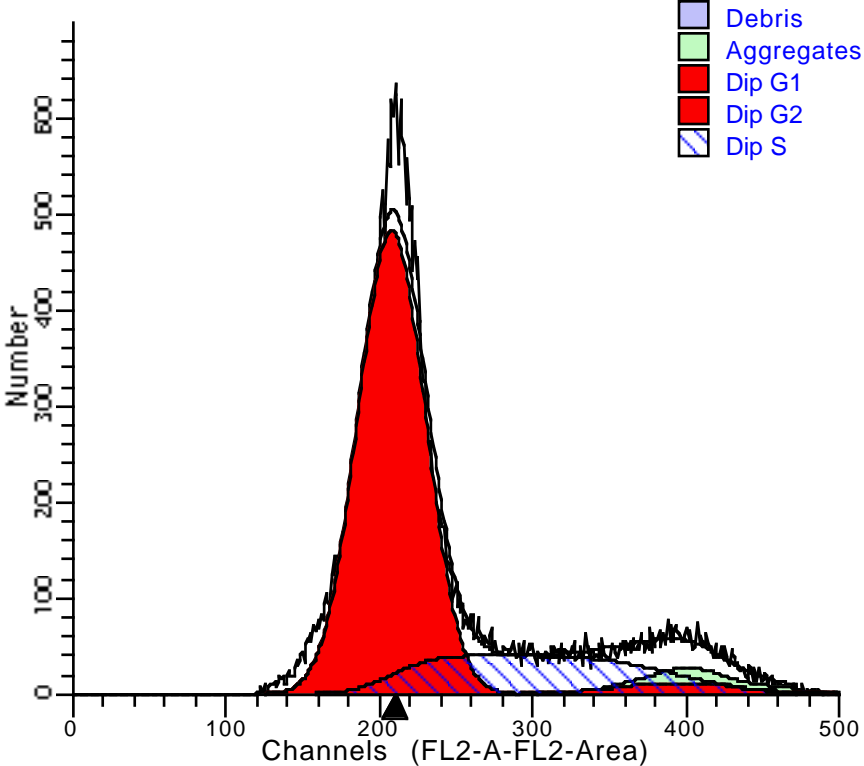

File analyzed: A2780 50uM SB-FI  
Date analyzed: 5-Feb-2019  
Model: 1DA0n\_DSD  
Analysis type: Manual analysis

Ploidy Mode: First cycle is diploid

Diploid: 100.00 %  
Dip G1: 75.33 % at 207.86  
Dip G2: 3.30 % at 394.94  
Dip S: 21.37 % G2/G1: 1.90  
%CV: 10.51

Total S-Phase: 21.37 %  
Total B.A.D.: 3.98 %

Debris: 0.18 %  
Aggregates: 5.76 %  
Modeled events: 37342  
All cycle events: 35121  
Cycle events per channel: 187  
RCS: 2.894

|       |                        |
|-------|------------------------|
| 10.51 | % CV                   |
| 35121 | Cell Number            |
| 187   | Avg. Cells Per Channel |
| n/a   | Aneuploid Fraction     |
| 3.98  | % B.A.D.               |
| 2.89  | RCS                    |

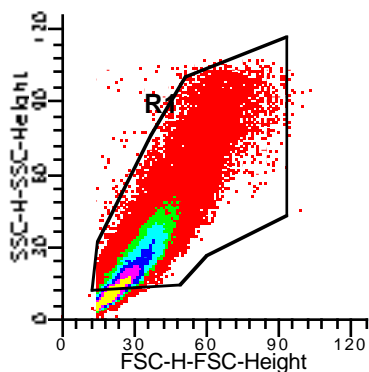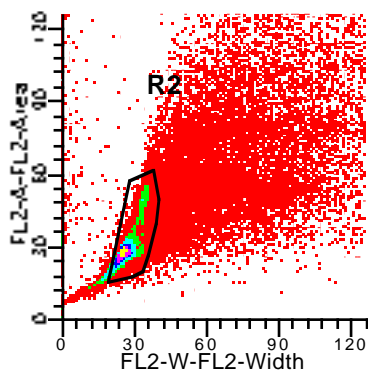

Supplement: s1 [file Supplementary Figure S4.pdf › Supplementary Figure S4.pdf]
