# Supplementary material for: Pharmacological Inhibition of Lipid Import and Transport Proteins in Ovarian Cancer
Source: MDPI journal article supplement (doi:10.3390/cancers14236004), 2022-12-05
Supplement: s1 [file Supplementary Table S1.pdf › Supplementary Table S1.pdf]

**Supplementary Table S1: Drug-induced modulation of mRNAs encoding targeted lipid handling proteins as determined by RNA-Seq analysis**

| mRNA Expression (fold change of treated cells relative to untreated control cells) |         |           |          |          |      |       |         |           |          |          |     |
|------------------------------------------------------------------------------------|---------|-----------|----------|----------|------|-------|---------|-----------|----------|----------|-----|
| A2780                                                                              |         |           |          |          |      | SKOV3 |         |           |          |          |     |
|                                                                                    | NAV2729 | BMS309403 | HTS01037 | SB-FI-26 | SSO  |       | NAV2729 | BMS309403 | HTS01037 | SB-FI-26 | SSO |
| FABP4                                                                              | ~       | ~         | ~        | ~        | ~    | FABP4 | ~       | ~         | ~        | ~        | ~   |
| FABP5                                                                              | ~       | ~         | ~        | ~        | ~    | FABP5 | ~       | ~         | ~        | ~        | ~   |
| FABP6                                                                              | ~       | ~         | ~        | ~        | ~    | FABP6 | ~       | ~         | ~        | ~        | ~   |
| FATP2                                                                              | ~       | ~         | ~        | ~        | ~    | FATP2 | 0,20    | 0,50      | 0,54     | ~        | ~   |
| ARF6                                                                               | ~       | ~         | ~        | ~        | ~    | ARF6  | ~       | ~         | ~        | ~        | ~   |
| CD36                                                                               | ~       | ~         | ~        | ~        | ~    | CD36  | ~       | ~         | ~        | ~        | ~   |
| LDLR                                                                               | 1,55    | ~         | ~        | ~        | 2,48 | LDLR  | ~       | ~         | 0,65     | 0,51     | ~   |
| ~ ... no change                                                                    |         |           |          |          |      |       |         |           |          |          |     |
