# Supplementary material for: Pharmacological Inhibition of Lipid Import and Transport Proteins in Ovarian Cancer
Source: Cancers (Basel). 2022 Dec 5;14(23):6004. doi: 10.3390/cancers14236004 (PMC9737127; doi:10.3390/cancers14236004)
Supplement: Supplementary file 1 [file cancers-14-06004-s001.zip]

Archive with 11 entries (11 files):
- Supplementary Figure Legends corr TG221205.pdf
- Supplementary Figure S1.pdf
- Supplementary Figure S2.pdf
- Supplementary Figure S3.pdf
- Supplementary Figure S4.pdf
- Supplementary Figure S5A.pdf
- Supplementary Figure S5B.pdf
- Supplementary Figure S6.pdf
- Supplementary Figure S7.pdf
- Supplementary Figure S8.pdf
- Supplementary Table S1.pdf
