# Supplementary figures and images for: Pharmacological Inhibition of Lipid Import and Transport Proteins in Ovarian Cancer
Source: MDPI journal article supplement (doi:10.3390/cancers14236004), 2022-12-05

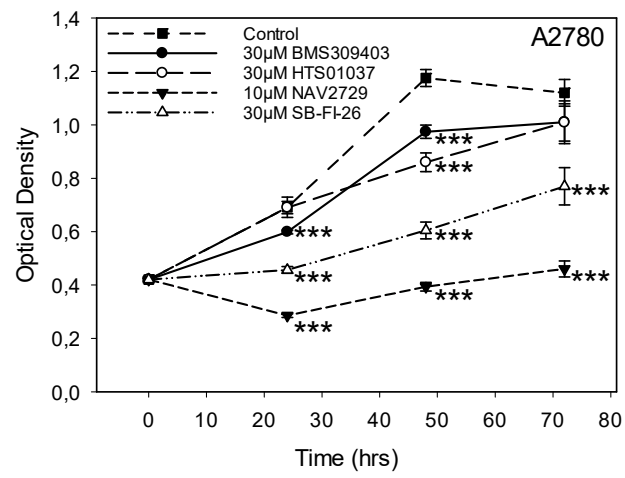

Supplementary Figure S1

Supplement: s1 [file Supplementary Figure S1.pdf › Supplementary Figure S1.pdf]

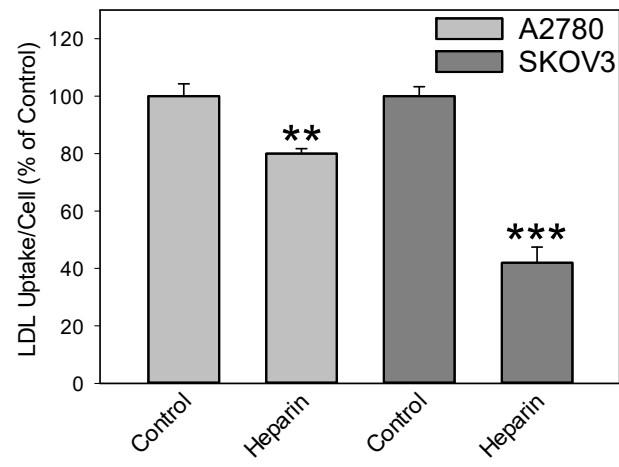

Supplement: s1 [file Supplementary Figure S2.pdf › Supplementary Figure S2.pdf]

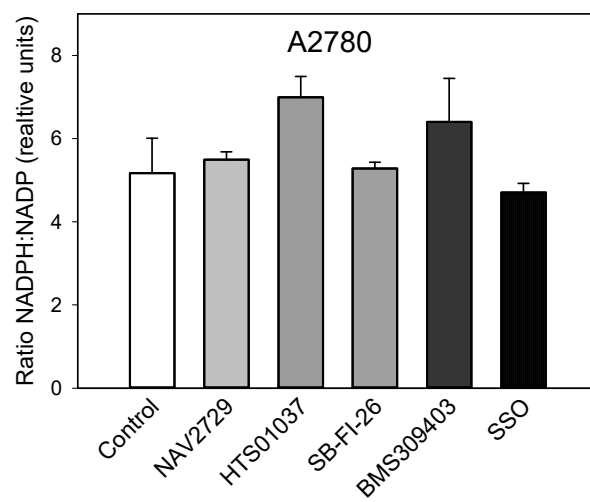

Supplement: s1 [file Supplementary Figure S3.pdf › Supplementary Figure S3.pdf]

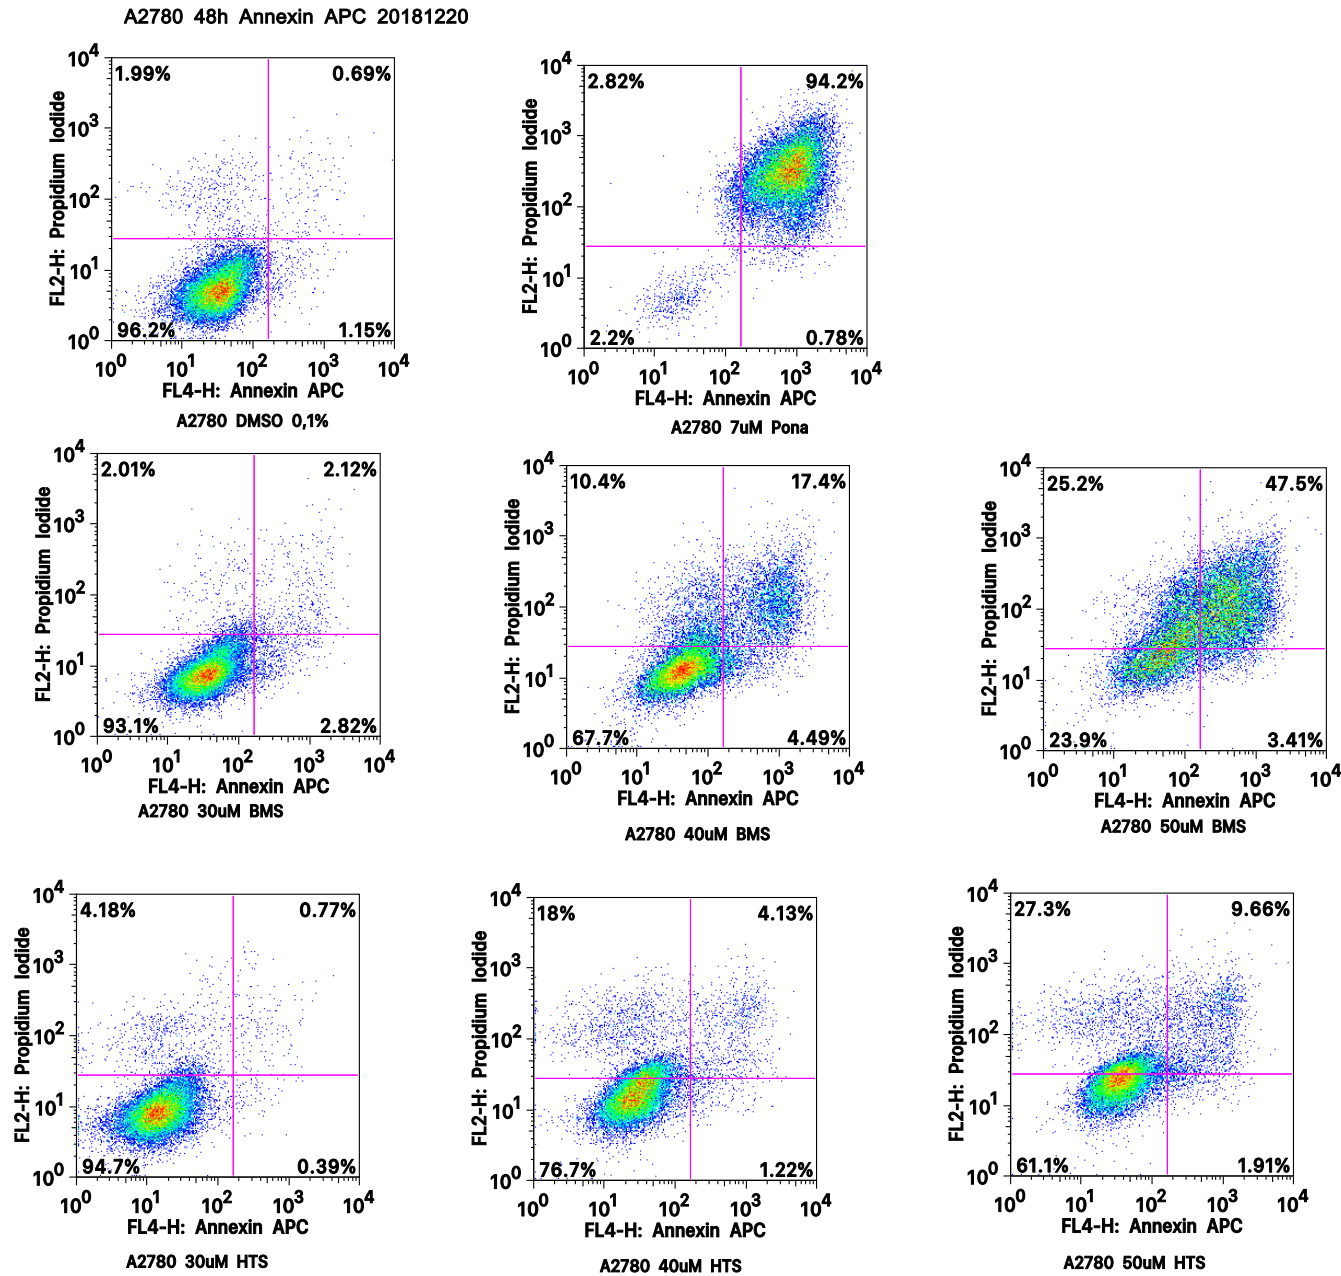

Supplementary Figure S5A

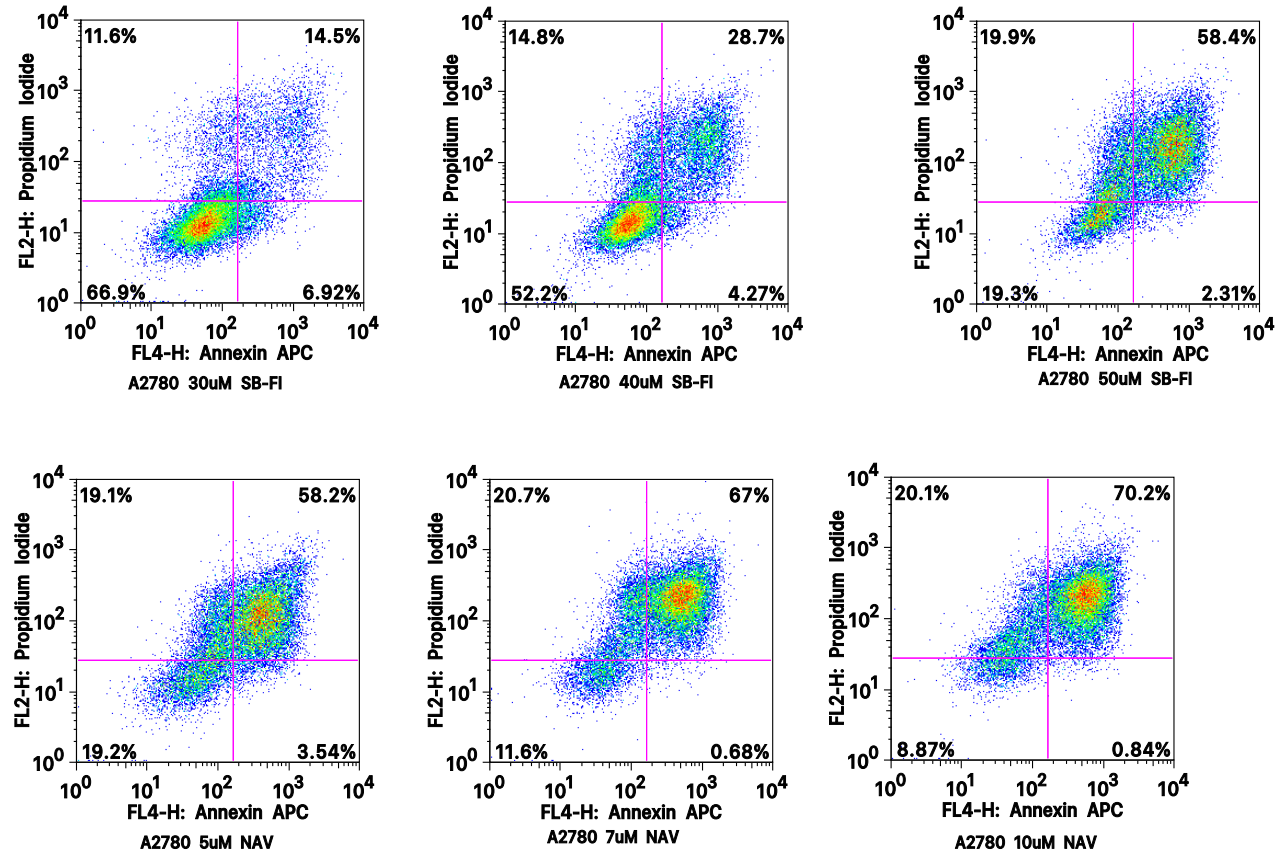

Supplement: s1 [file Supplementary Figure S5A.pdf › Supplementary Figure S5A.pdf]

20181221 A2780 48h Caspase 3

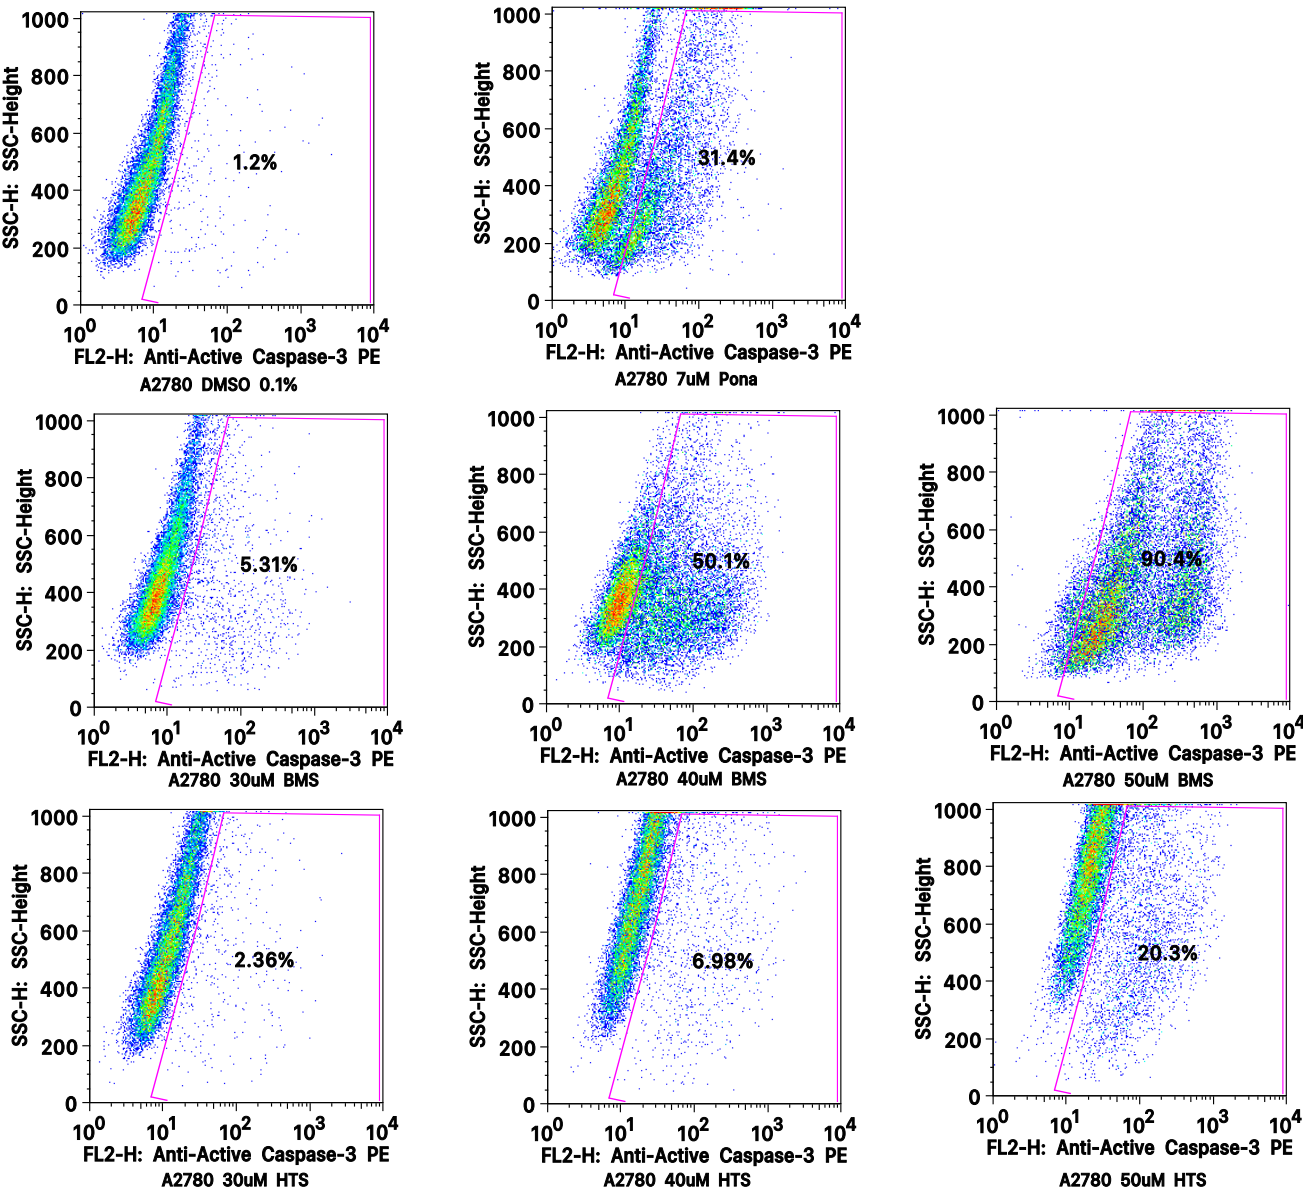

Supplementary Figure S5B

Layout

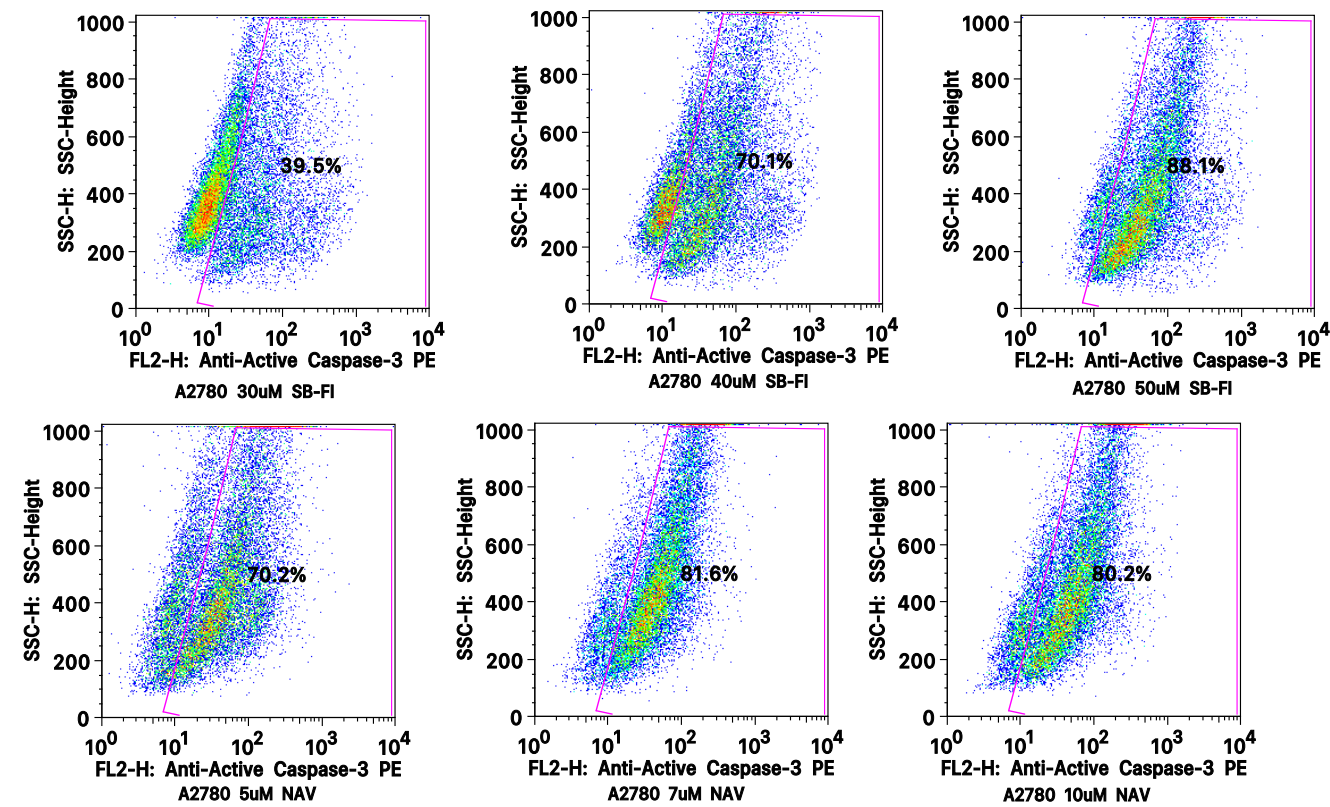

Supplement: s1 [file Supplementary Figure S5B.pdf › Supplementary Figure S5B.pdf]

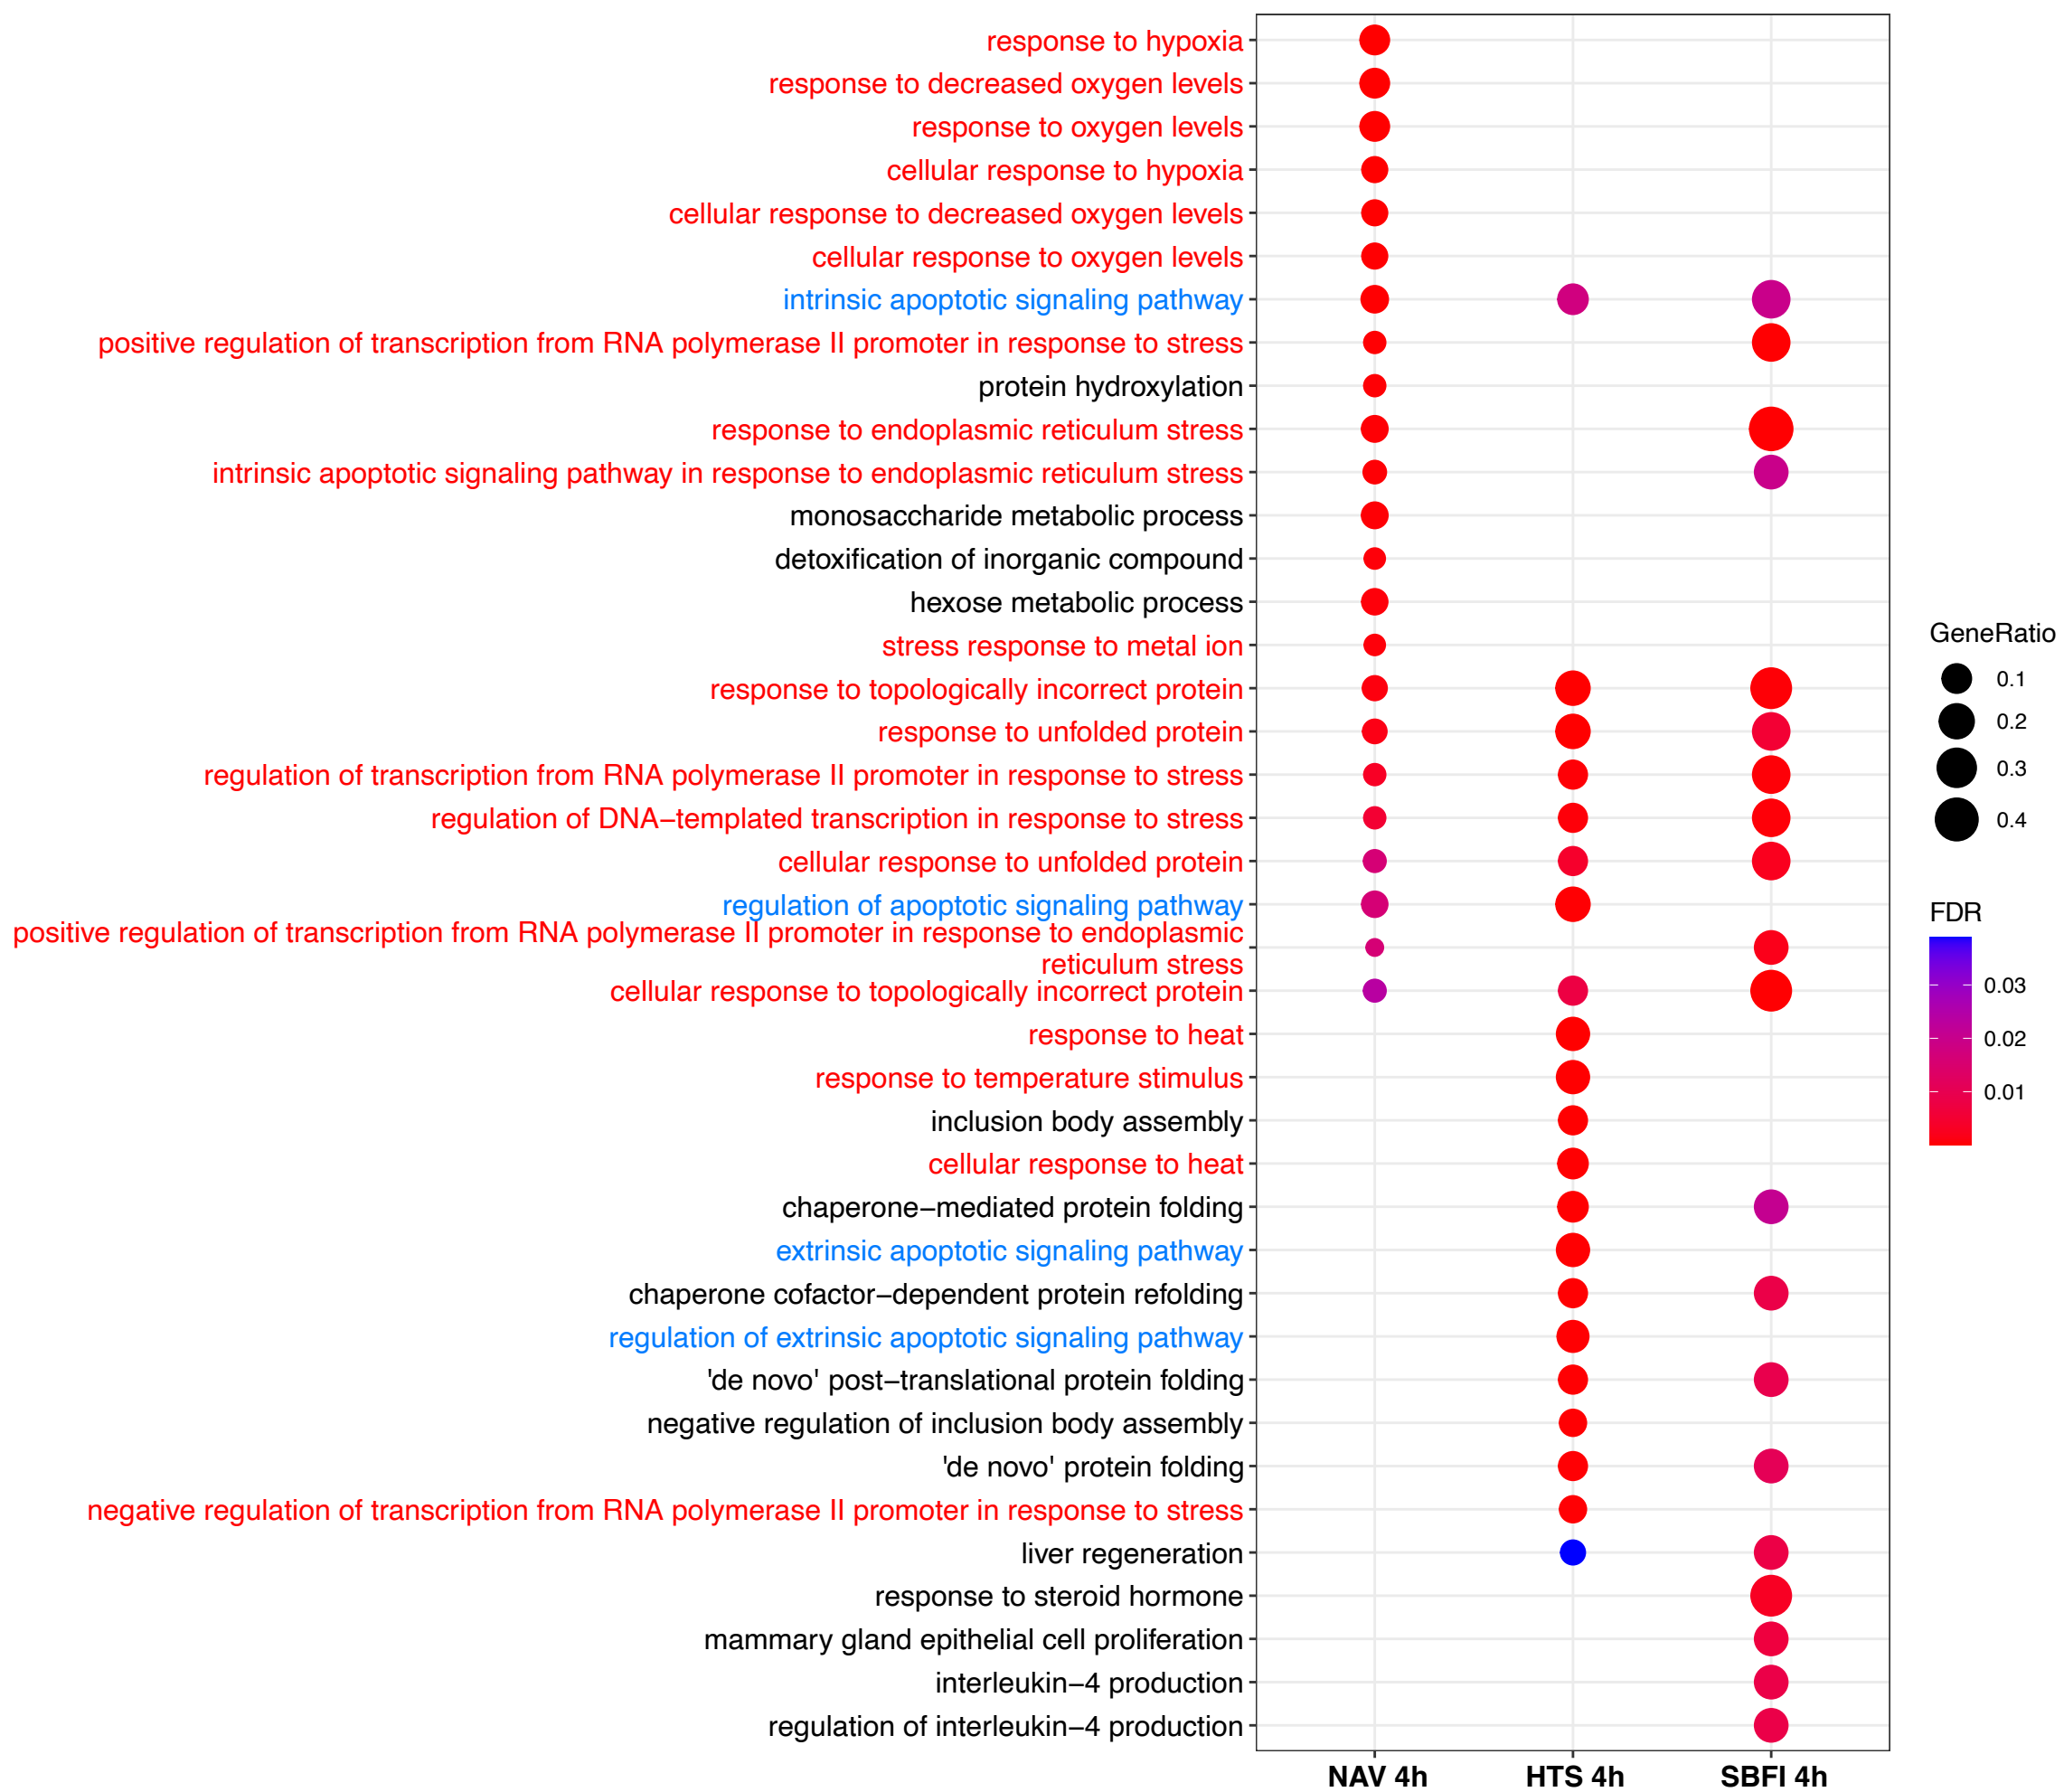

Supplementary Figure S6

Supplement: s1 [file Supplementary Figure S6.pdf › Supplementary Figure S6.pdf]

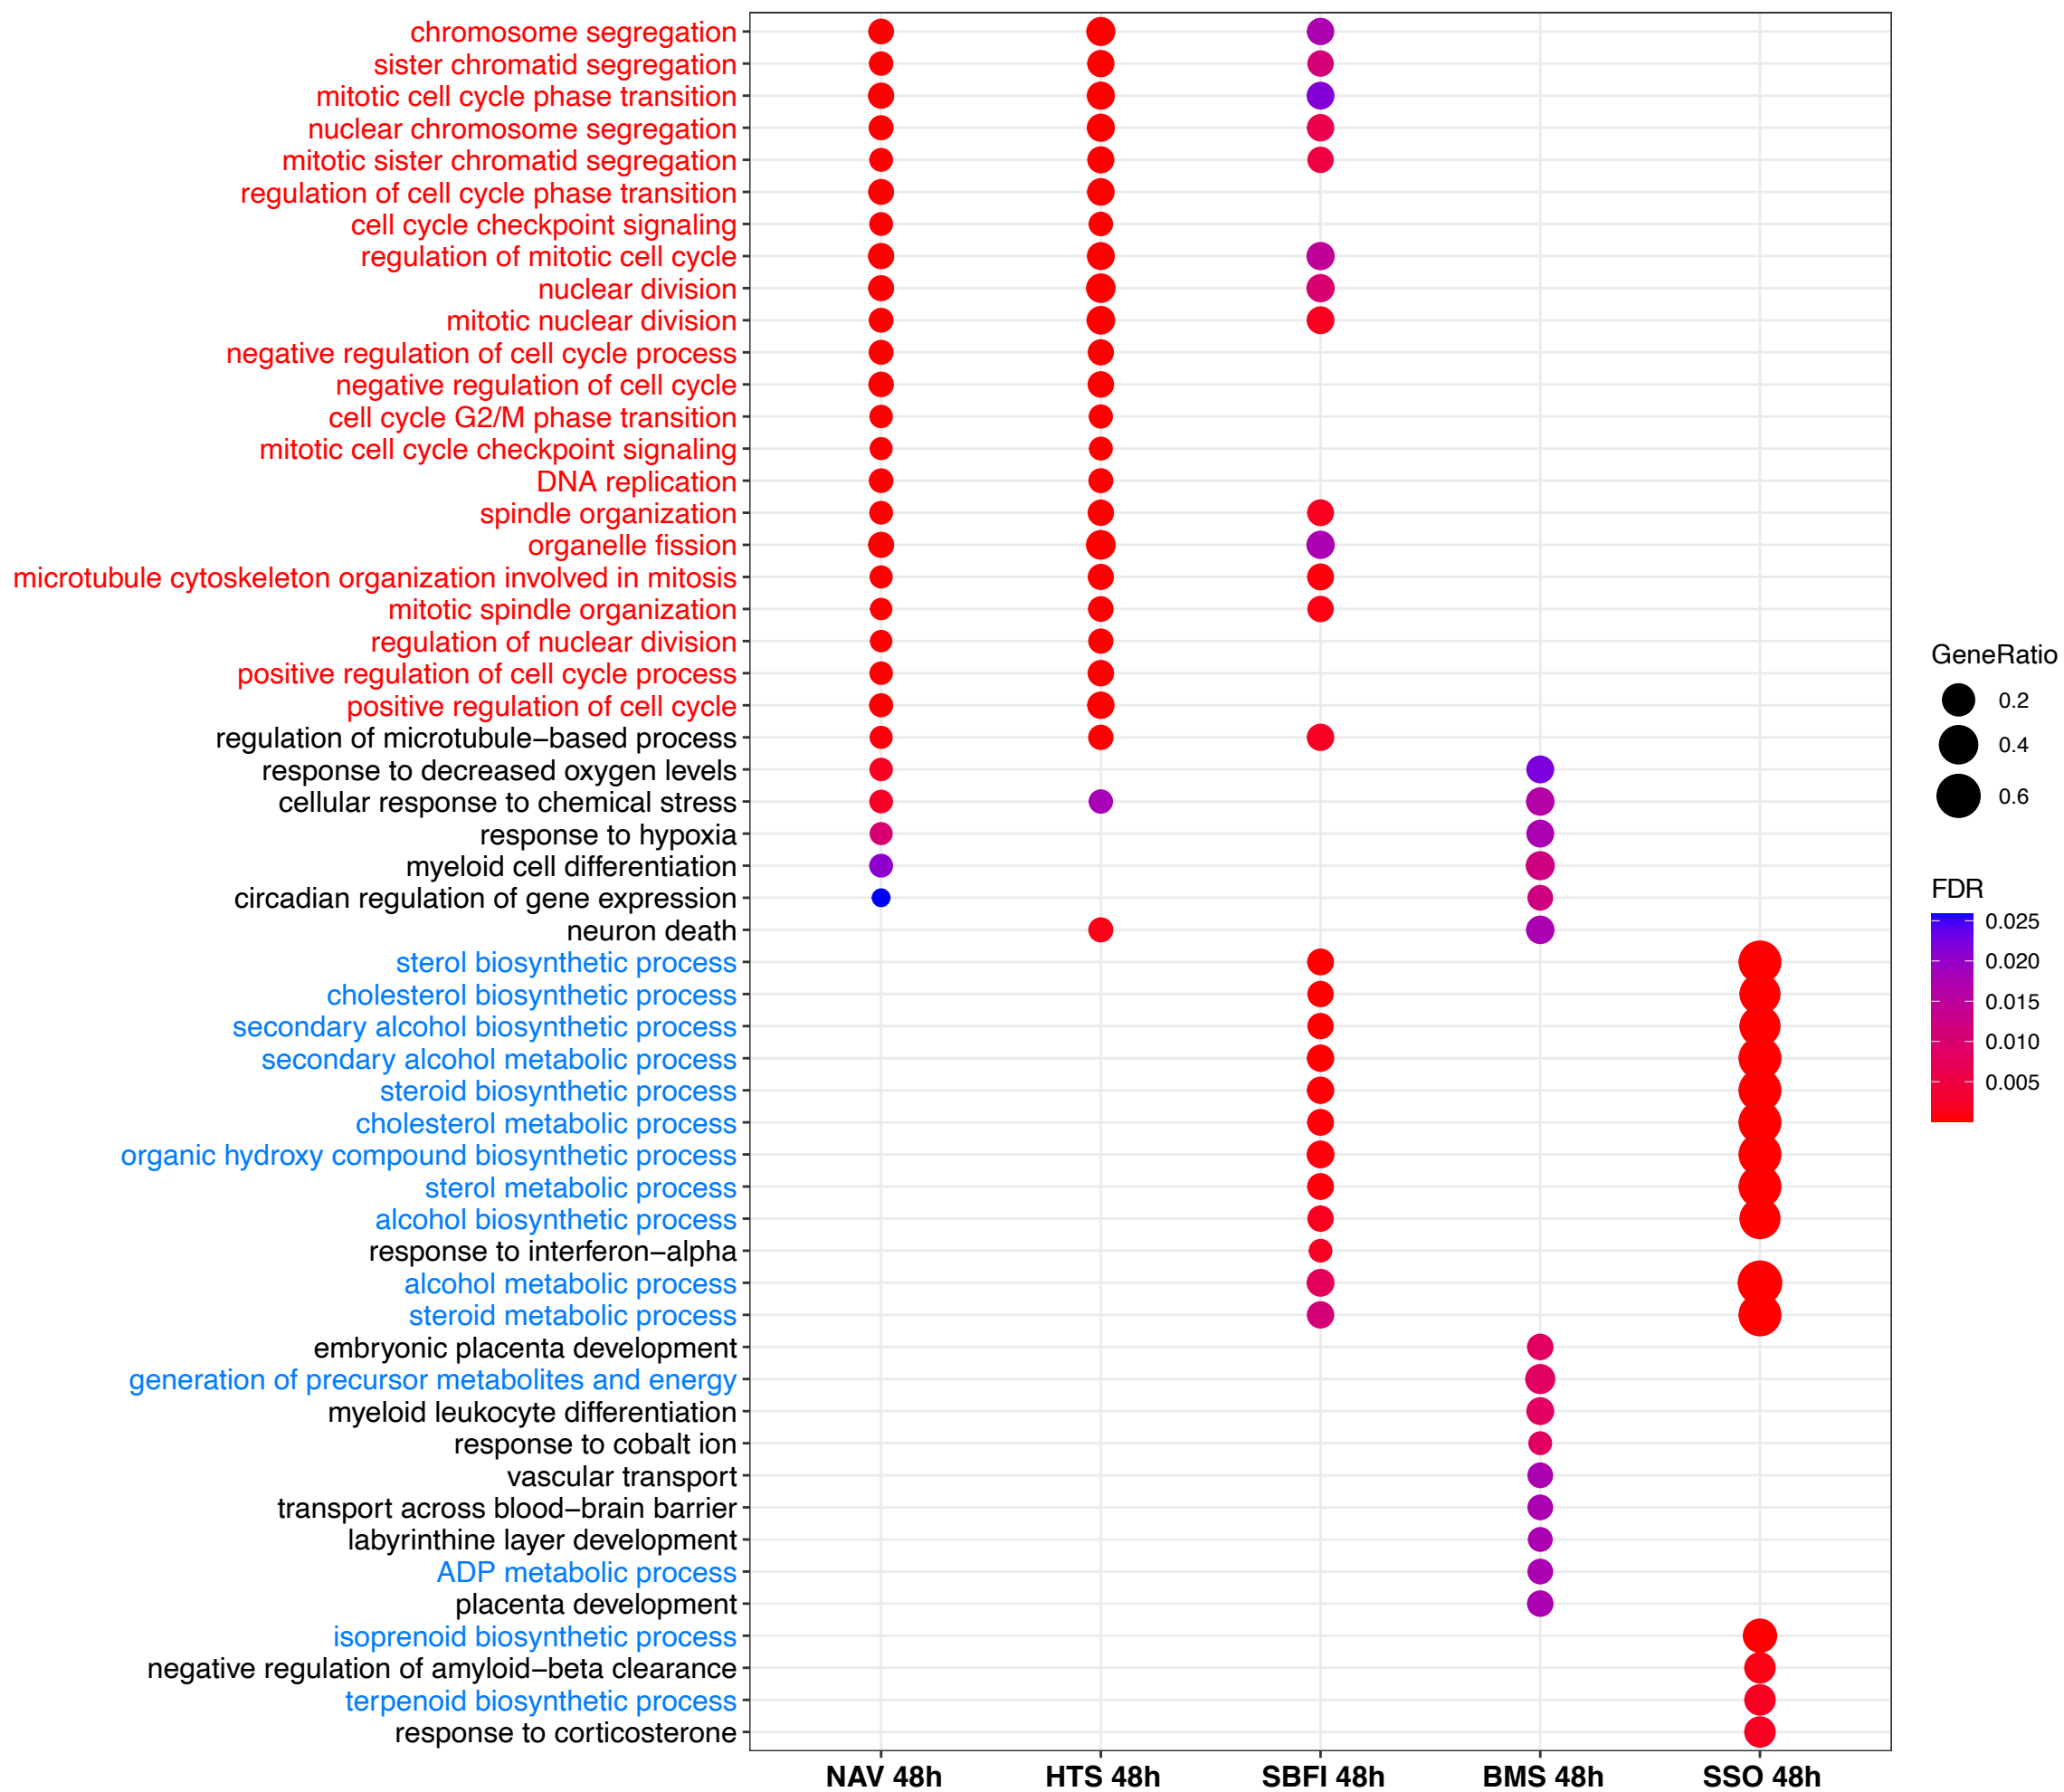

Supplementary Figure S7

Supplement: s1 [file Supplementary Figure S7.pdf › Supplementary Figure S7.pdf]

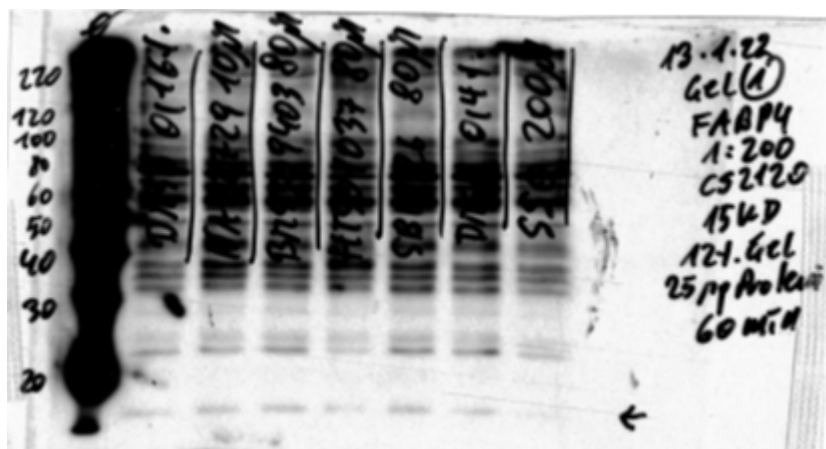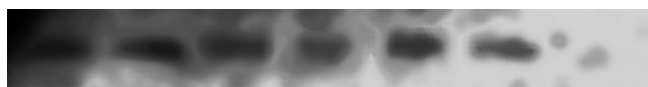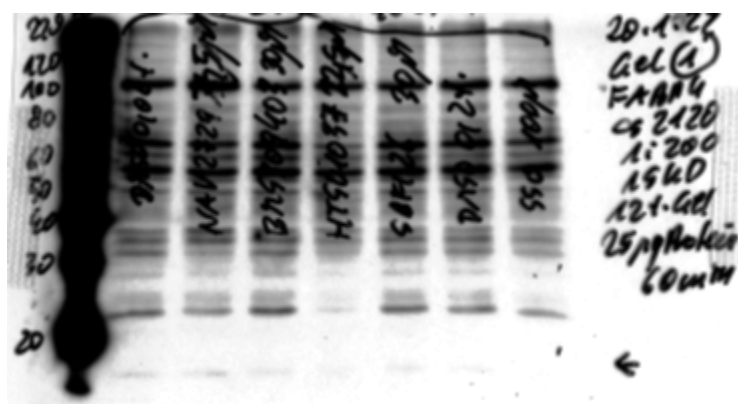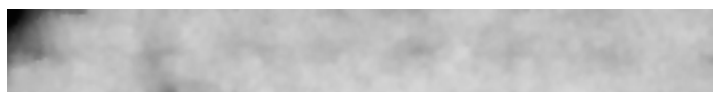

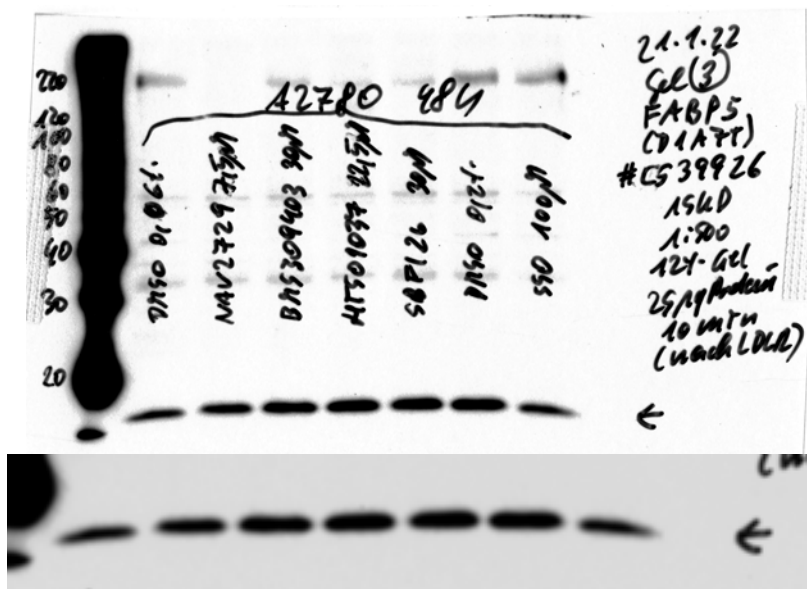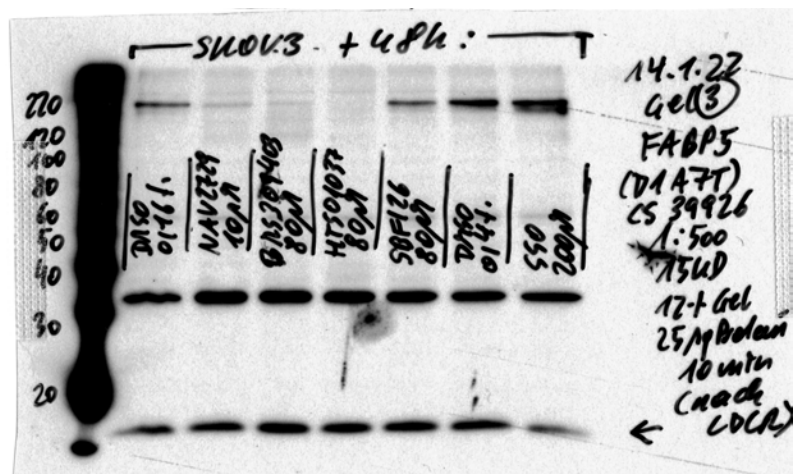

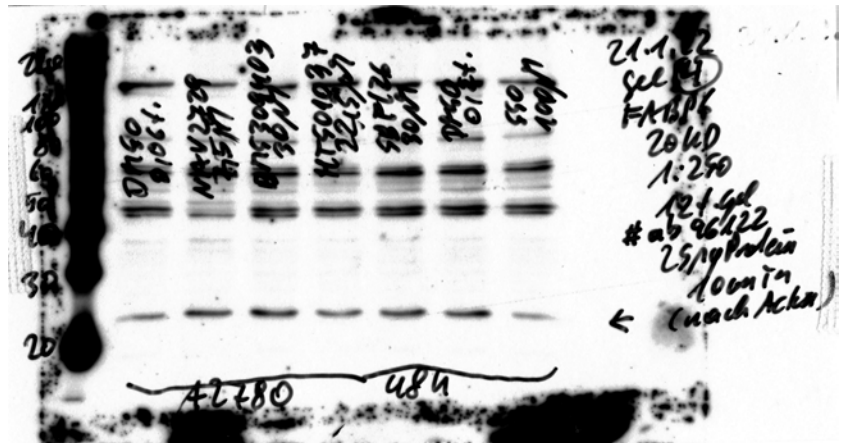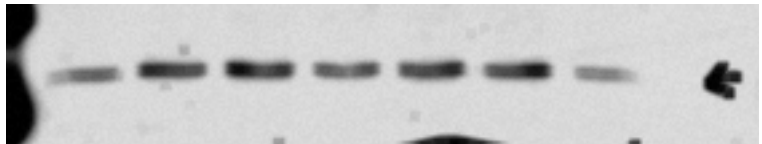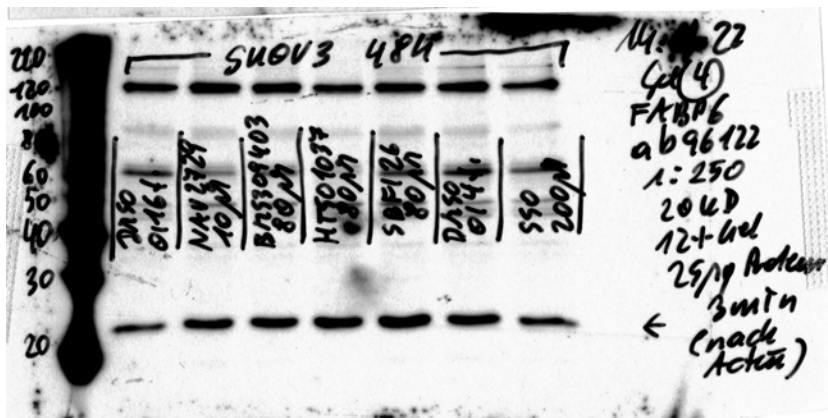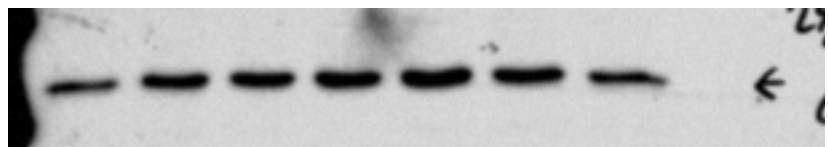

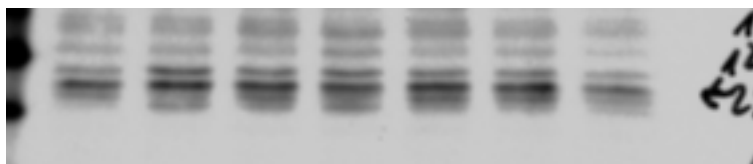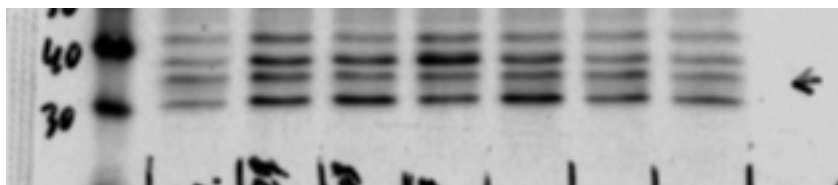

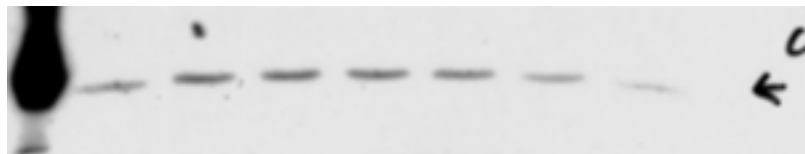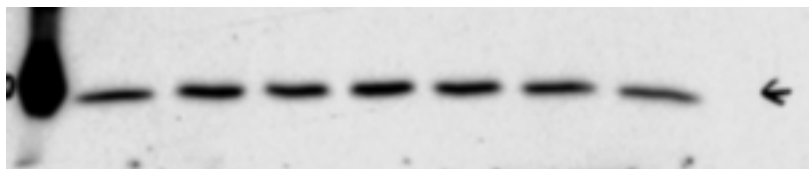

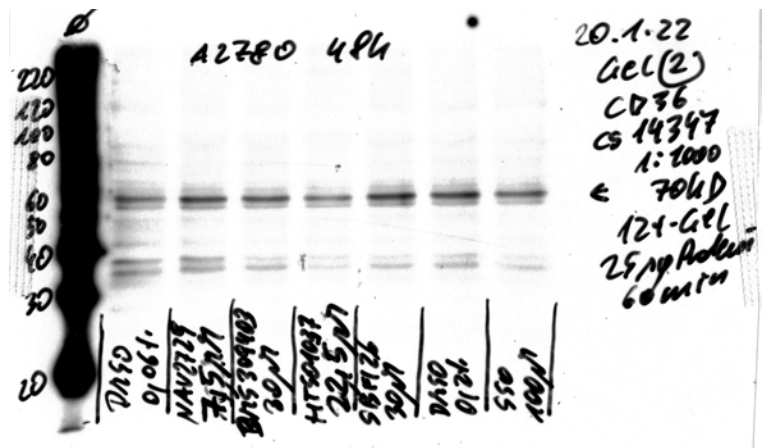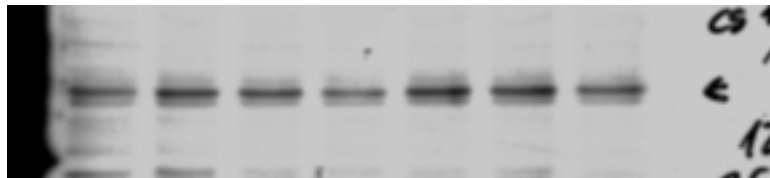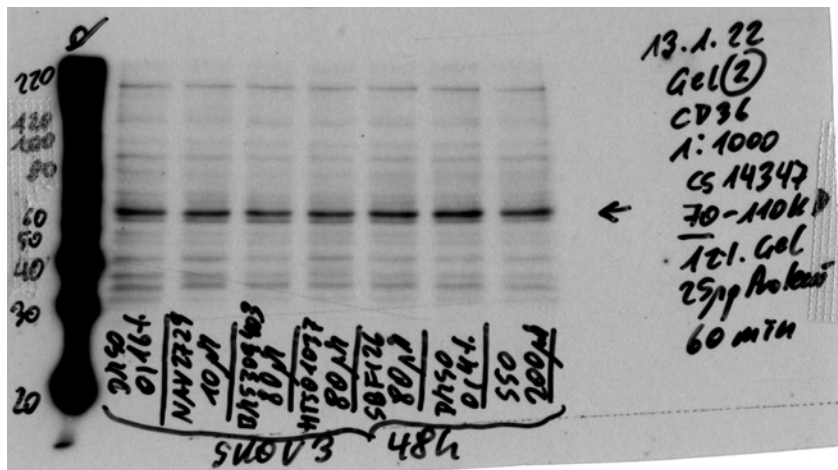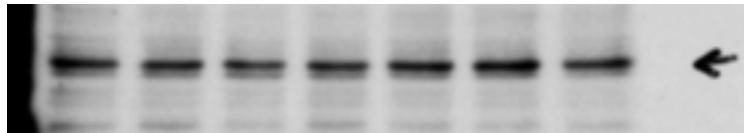

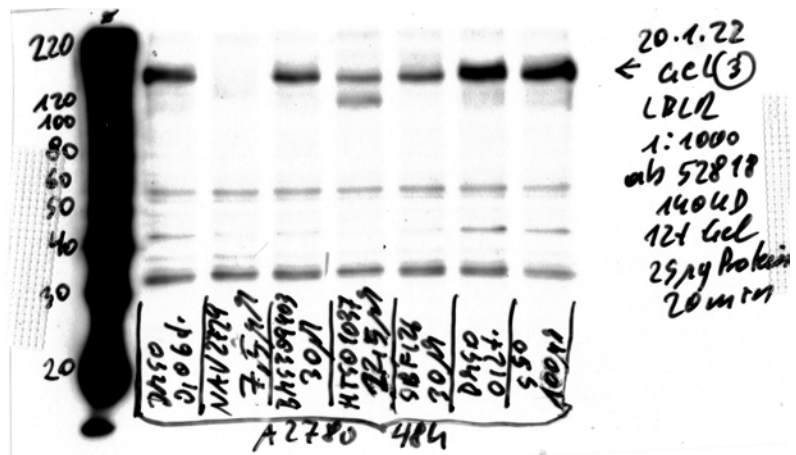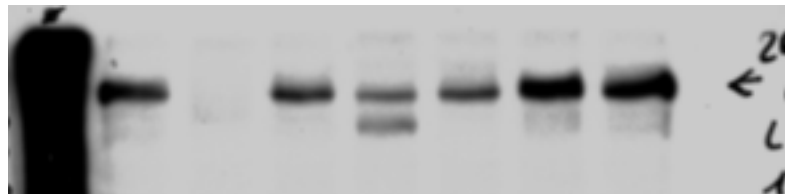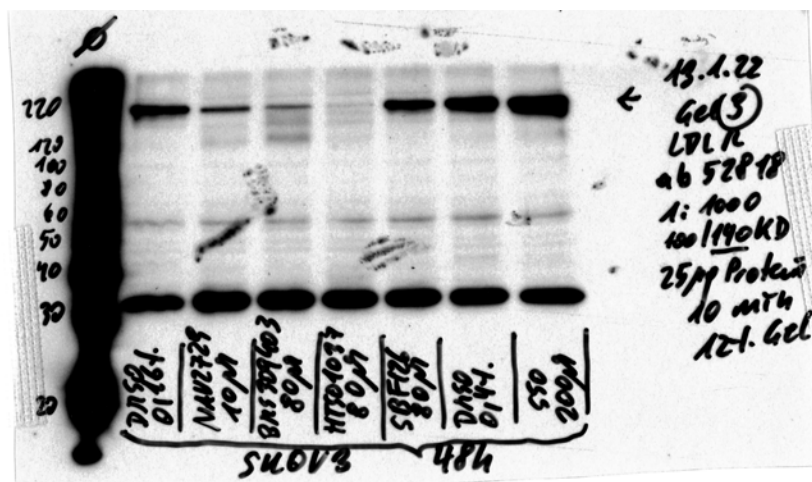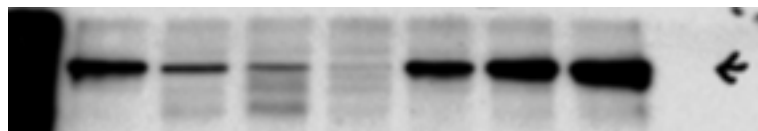

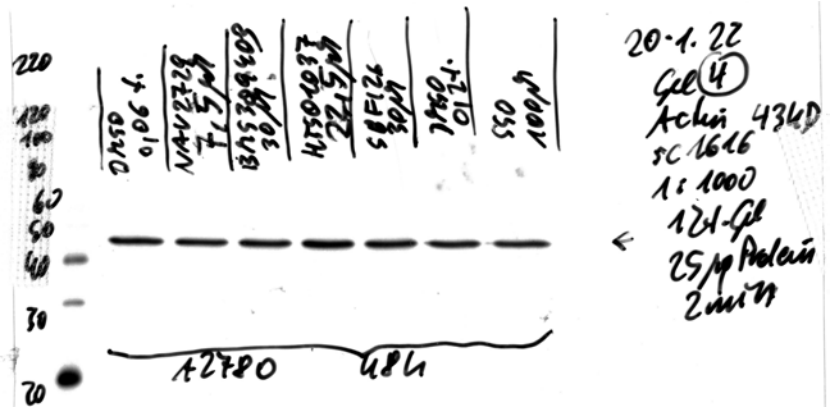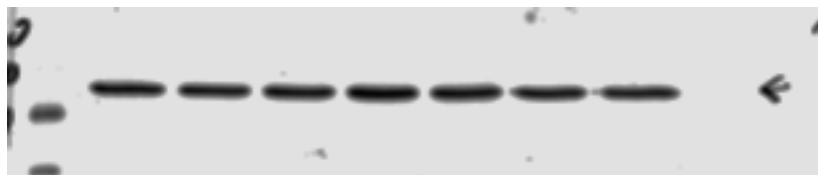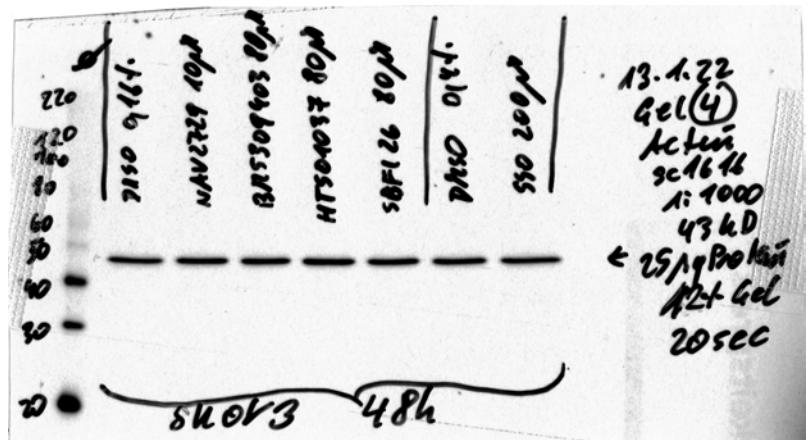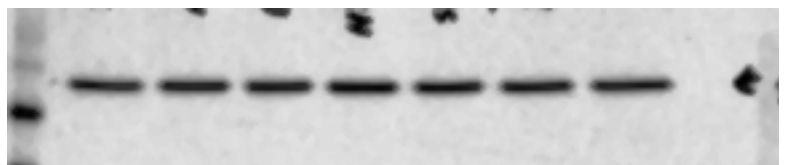

Supplement: s1 [file Supplementary Figure S8.pdf › Supplementary Figure S8.pdf]
